# Supplementary material for: Dimethyl homophthalates to naphthopyrans: the total synthesis of arnottin I and the formal synthesis of (−)-arnottin II
Source: Royal Society of Chemistry journal article supplement (doi:10.1039/c3ra45312j), 2013-11-19

## Supporting Information

# **Dimethyl homophthalates to naphthopyrans: total synthesis of arnottin I and the formal synthesis of (–)-arnottin II**

Ravi Jangir and Narshinha P. Argade\*

*Division of Organic Chemistry, National Chemical Laboratory (CSIR), Pune 411 008, India.*

*E-mail: np.argade@ncl.res.in*

SI-2

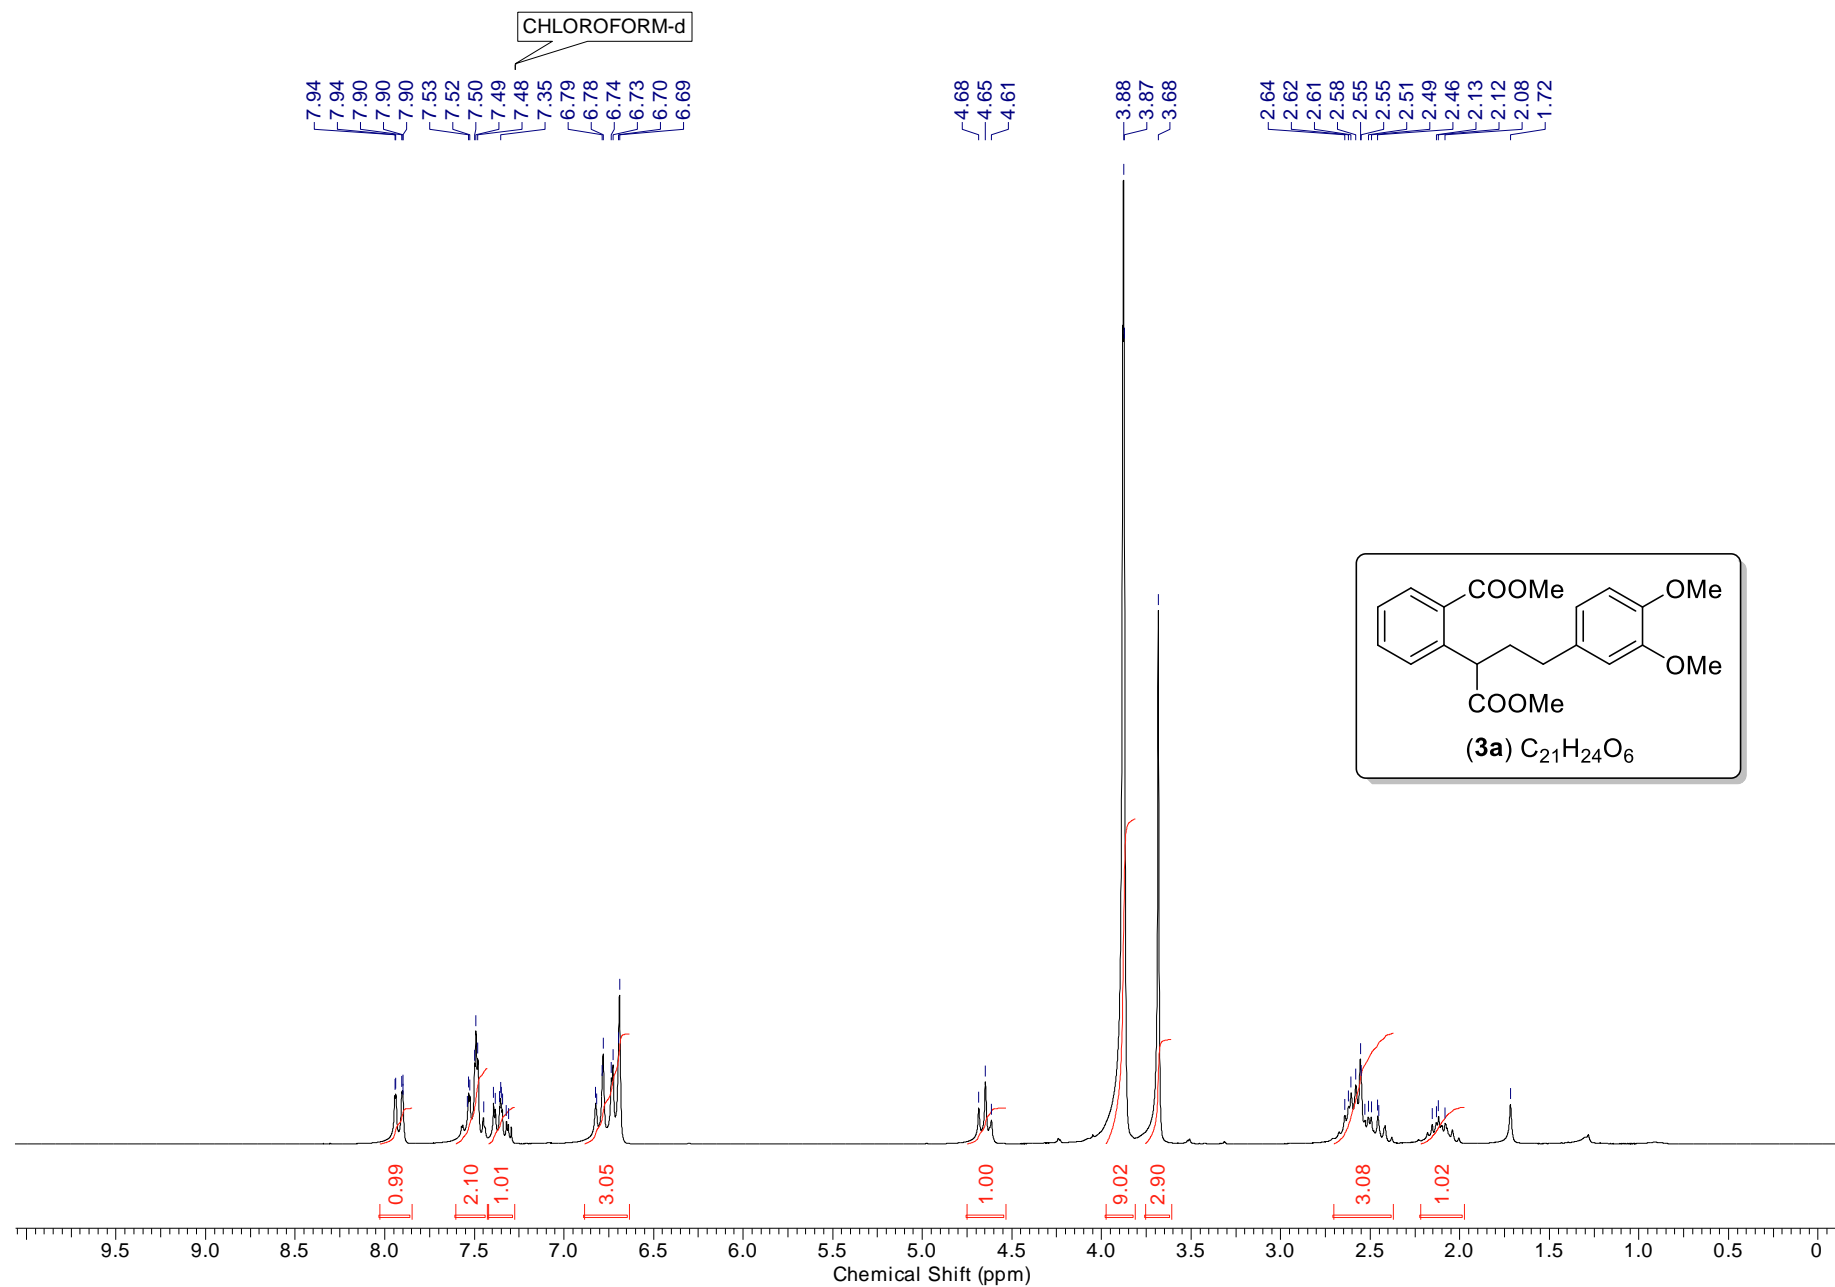

### SI-3

C-13 NMR 50 MHz  
CDCl<sub>3</sub>

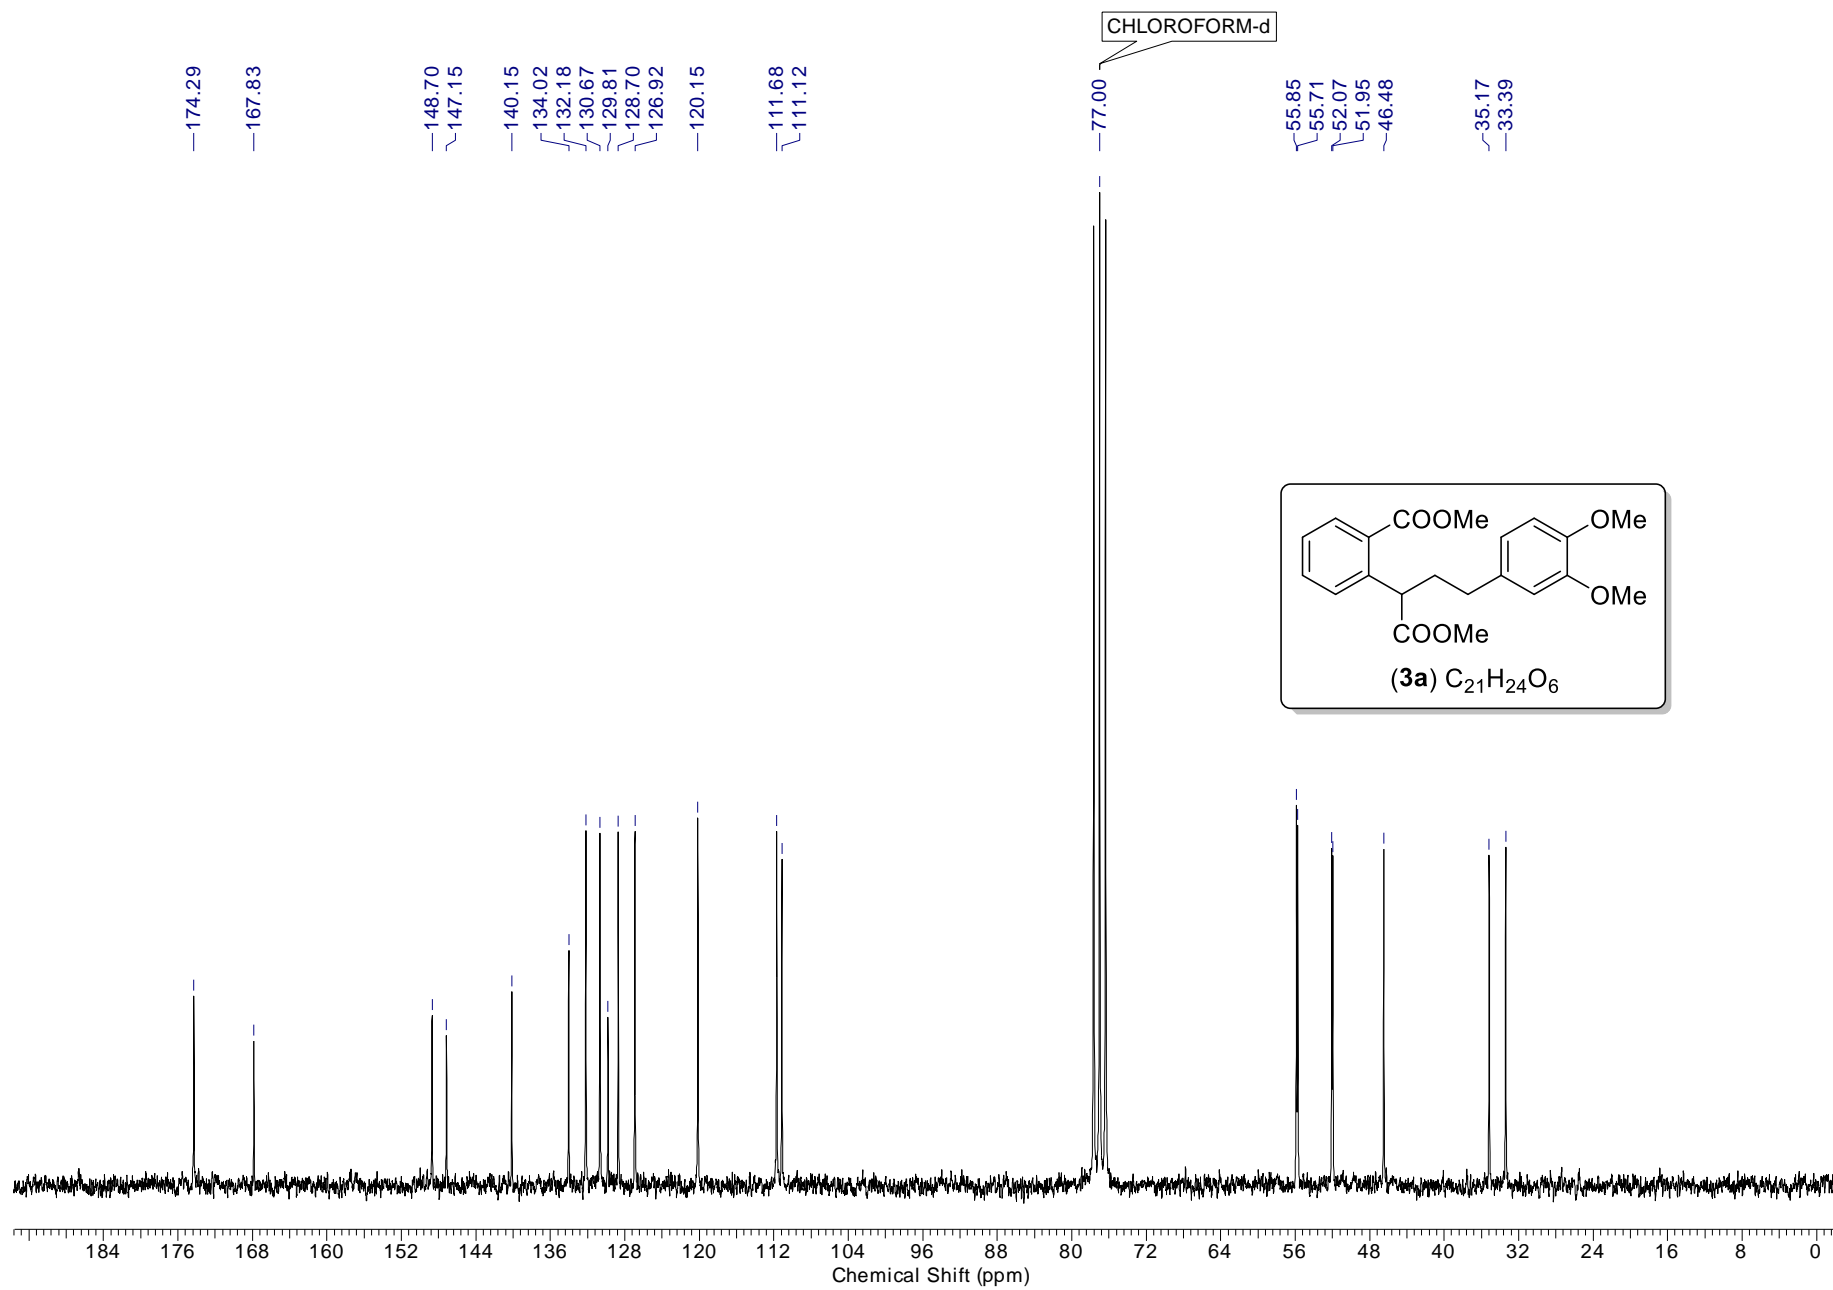

# SI-4

DEPT 50 MHz  
CDCl<sub>3</sub>

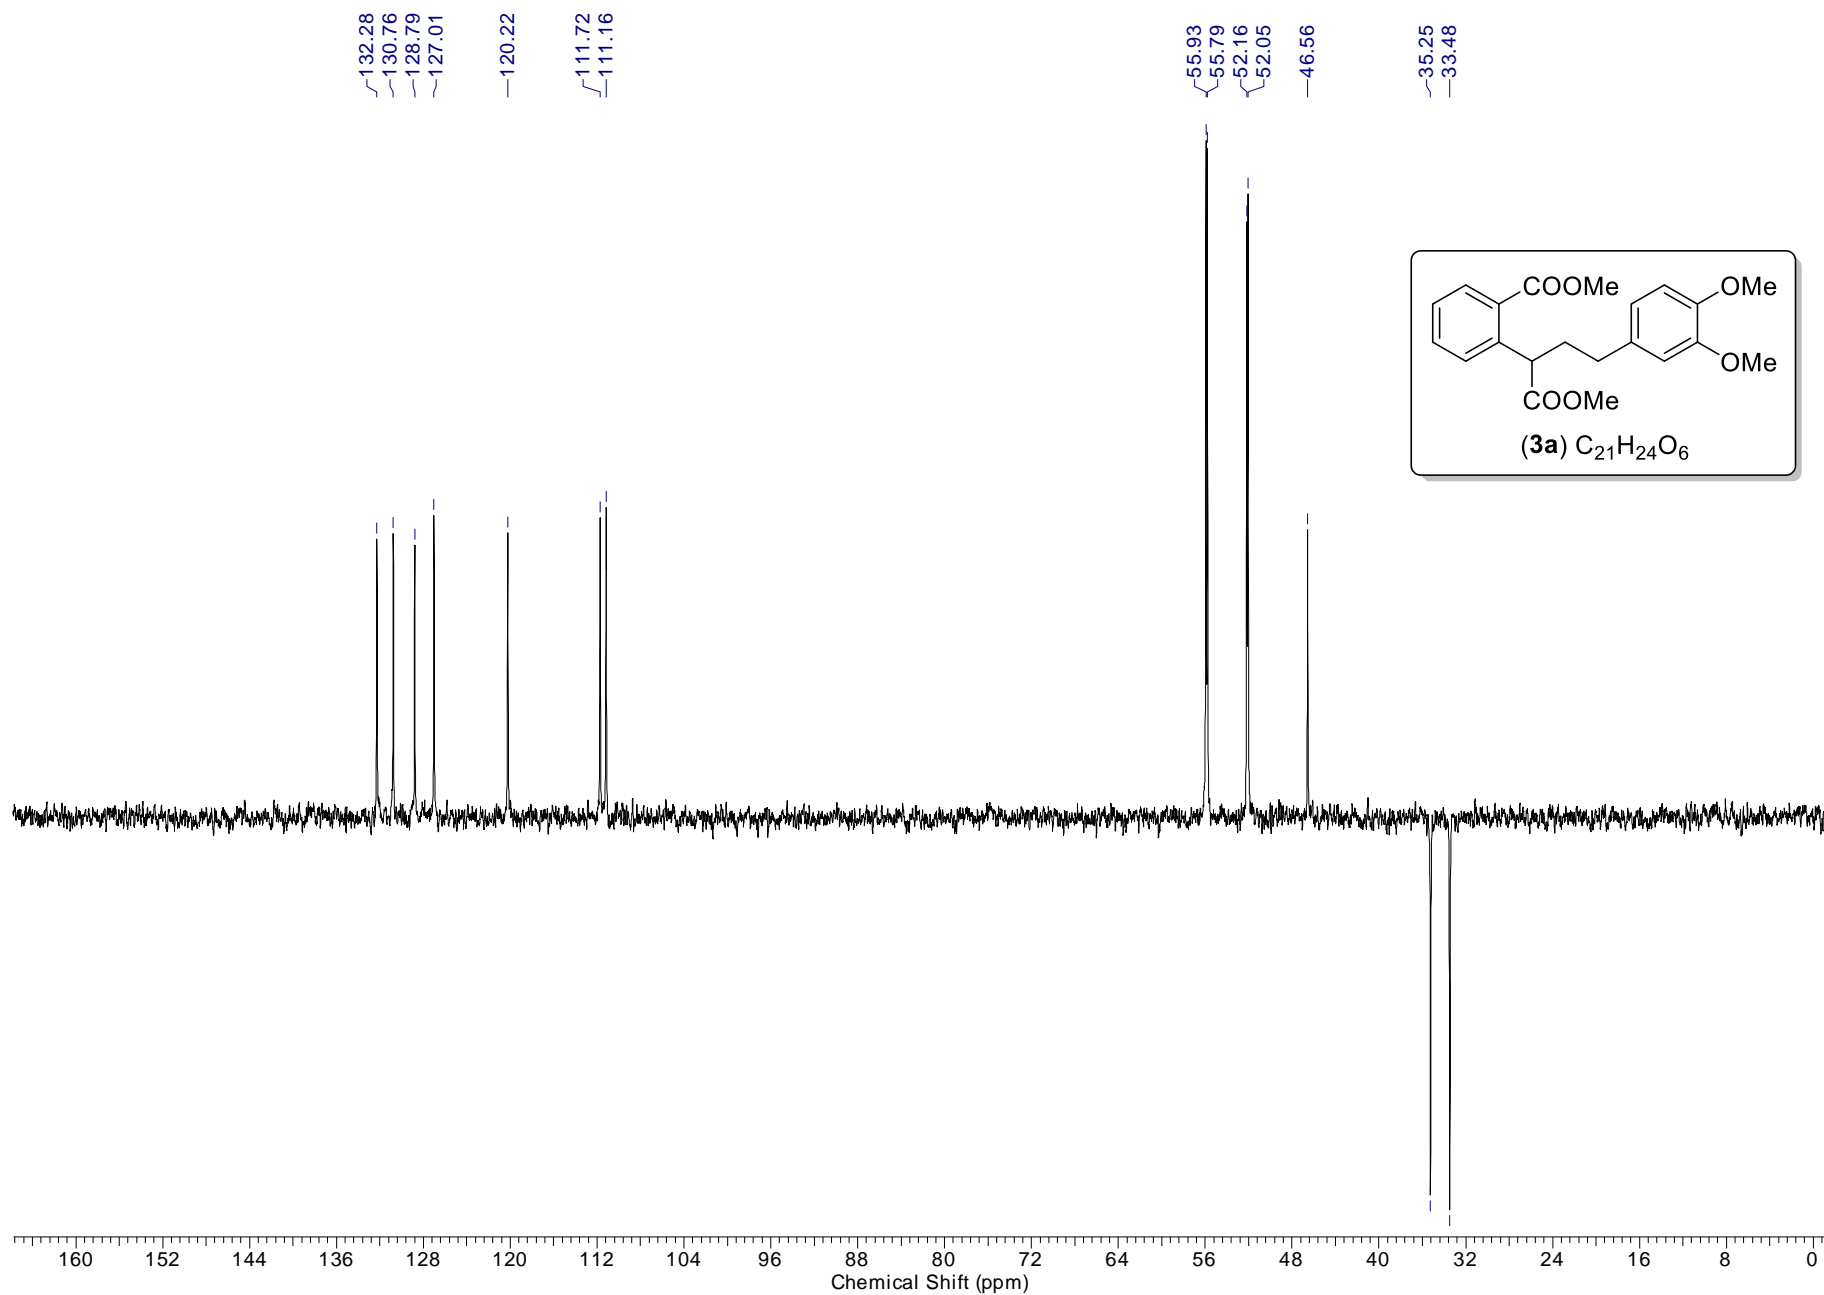

# SI-5

H1 NMR 200 MHz  
CDCl<sub>3</sub>

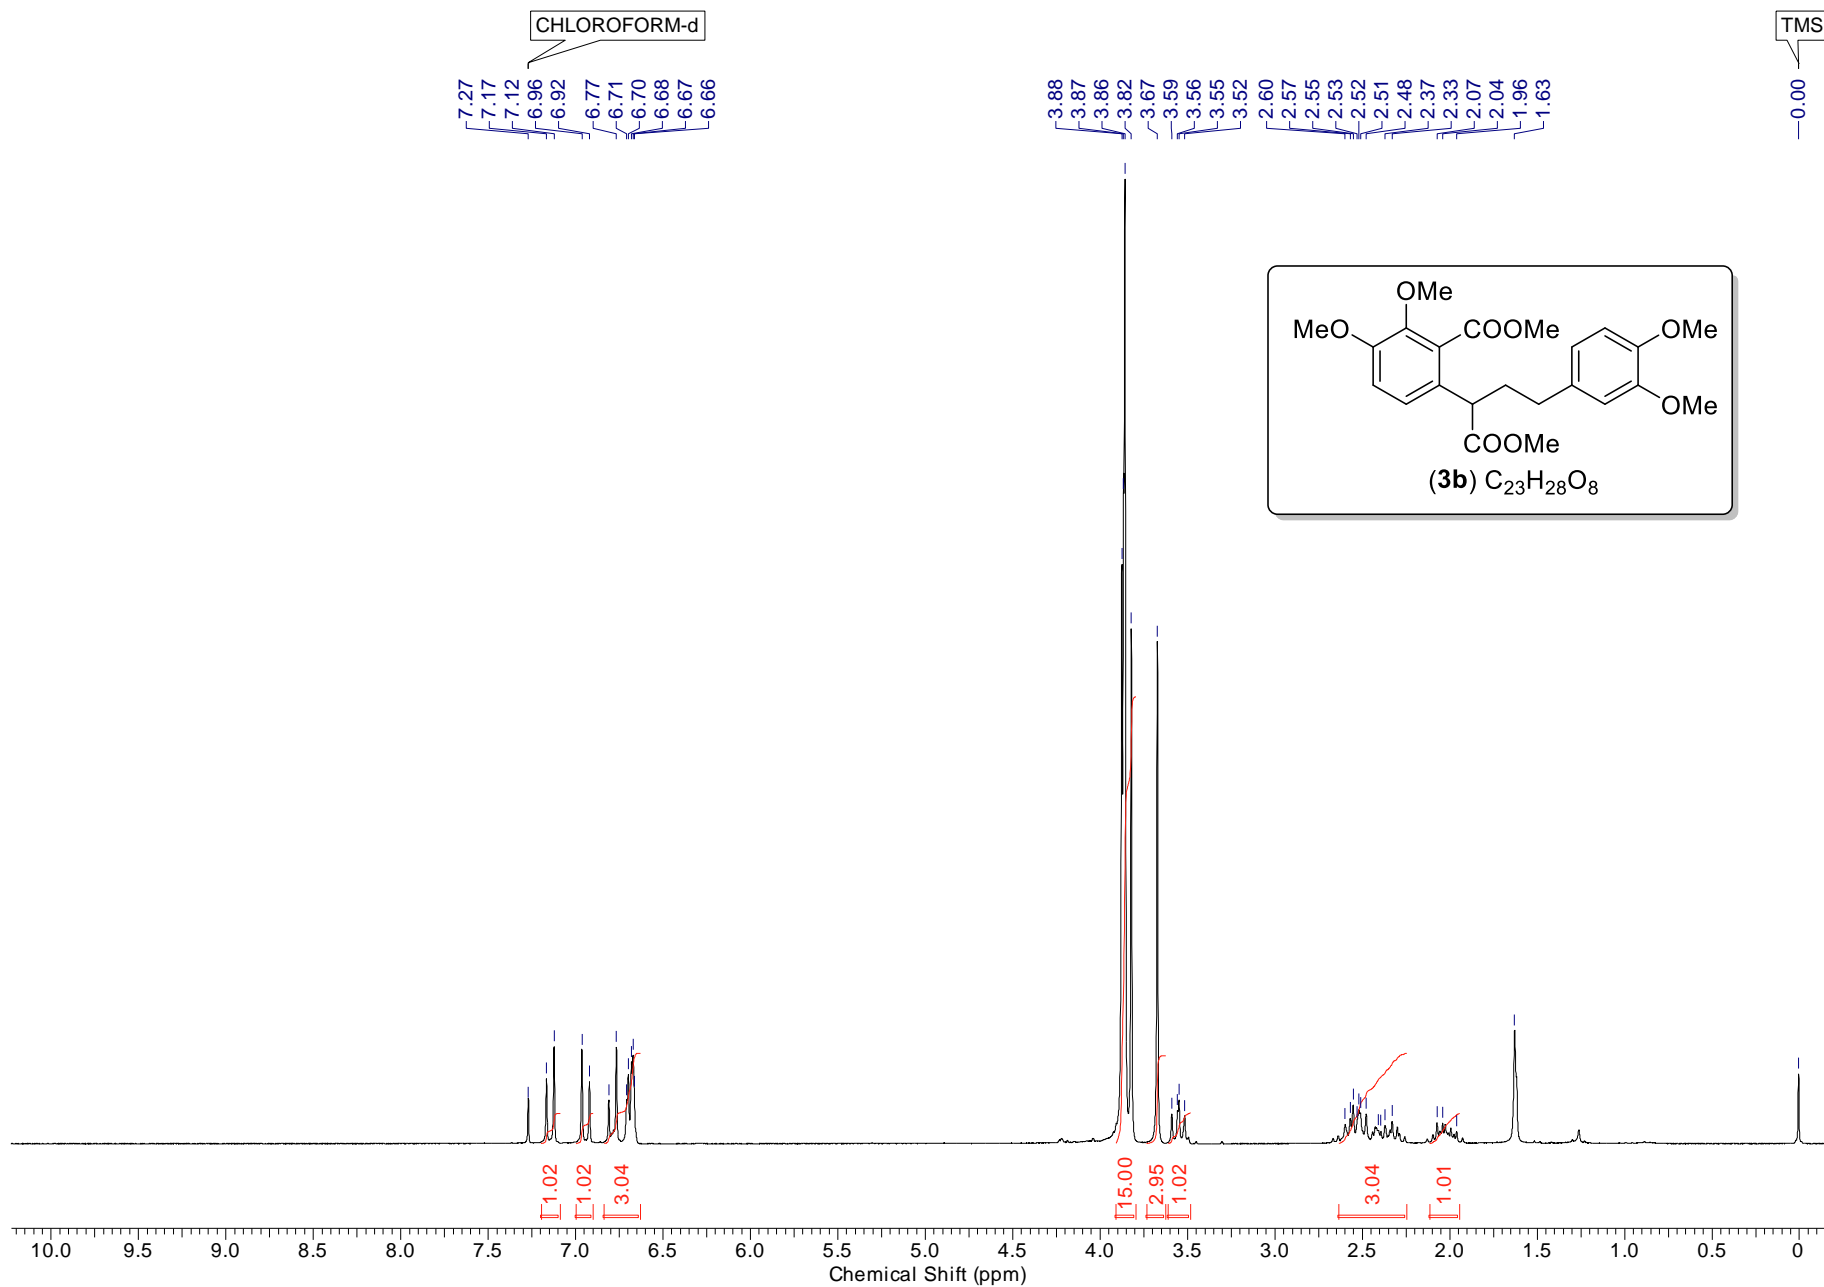

# SI-6

C-13 NMR 50 MHz  
CDCl<sub>3</sub>

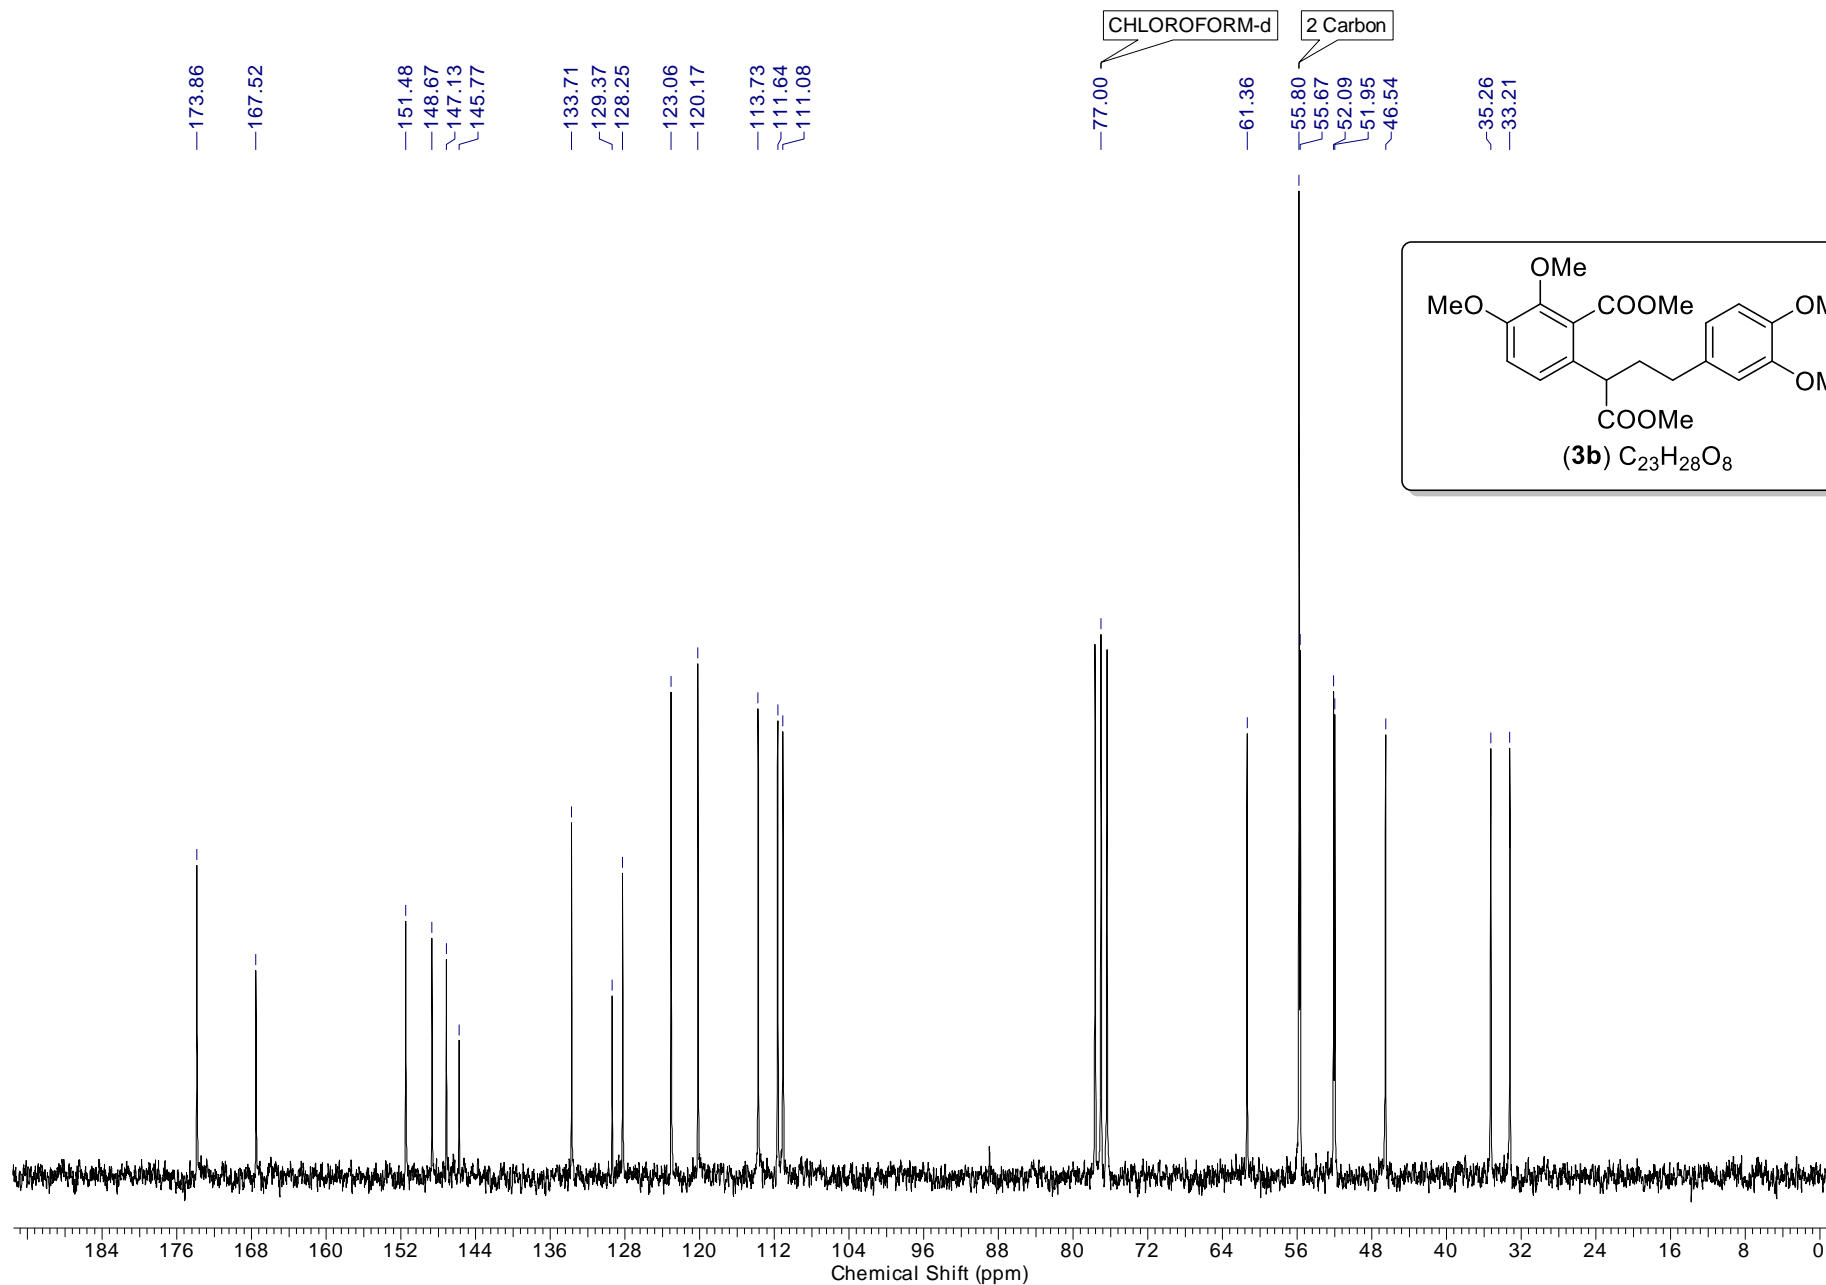

# SI-7

DEPT 50 MHz  
CDCl<sub>3</sub>

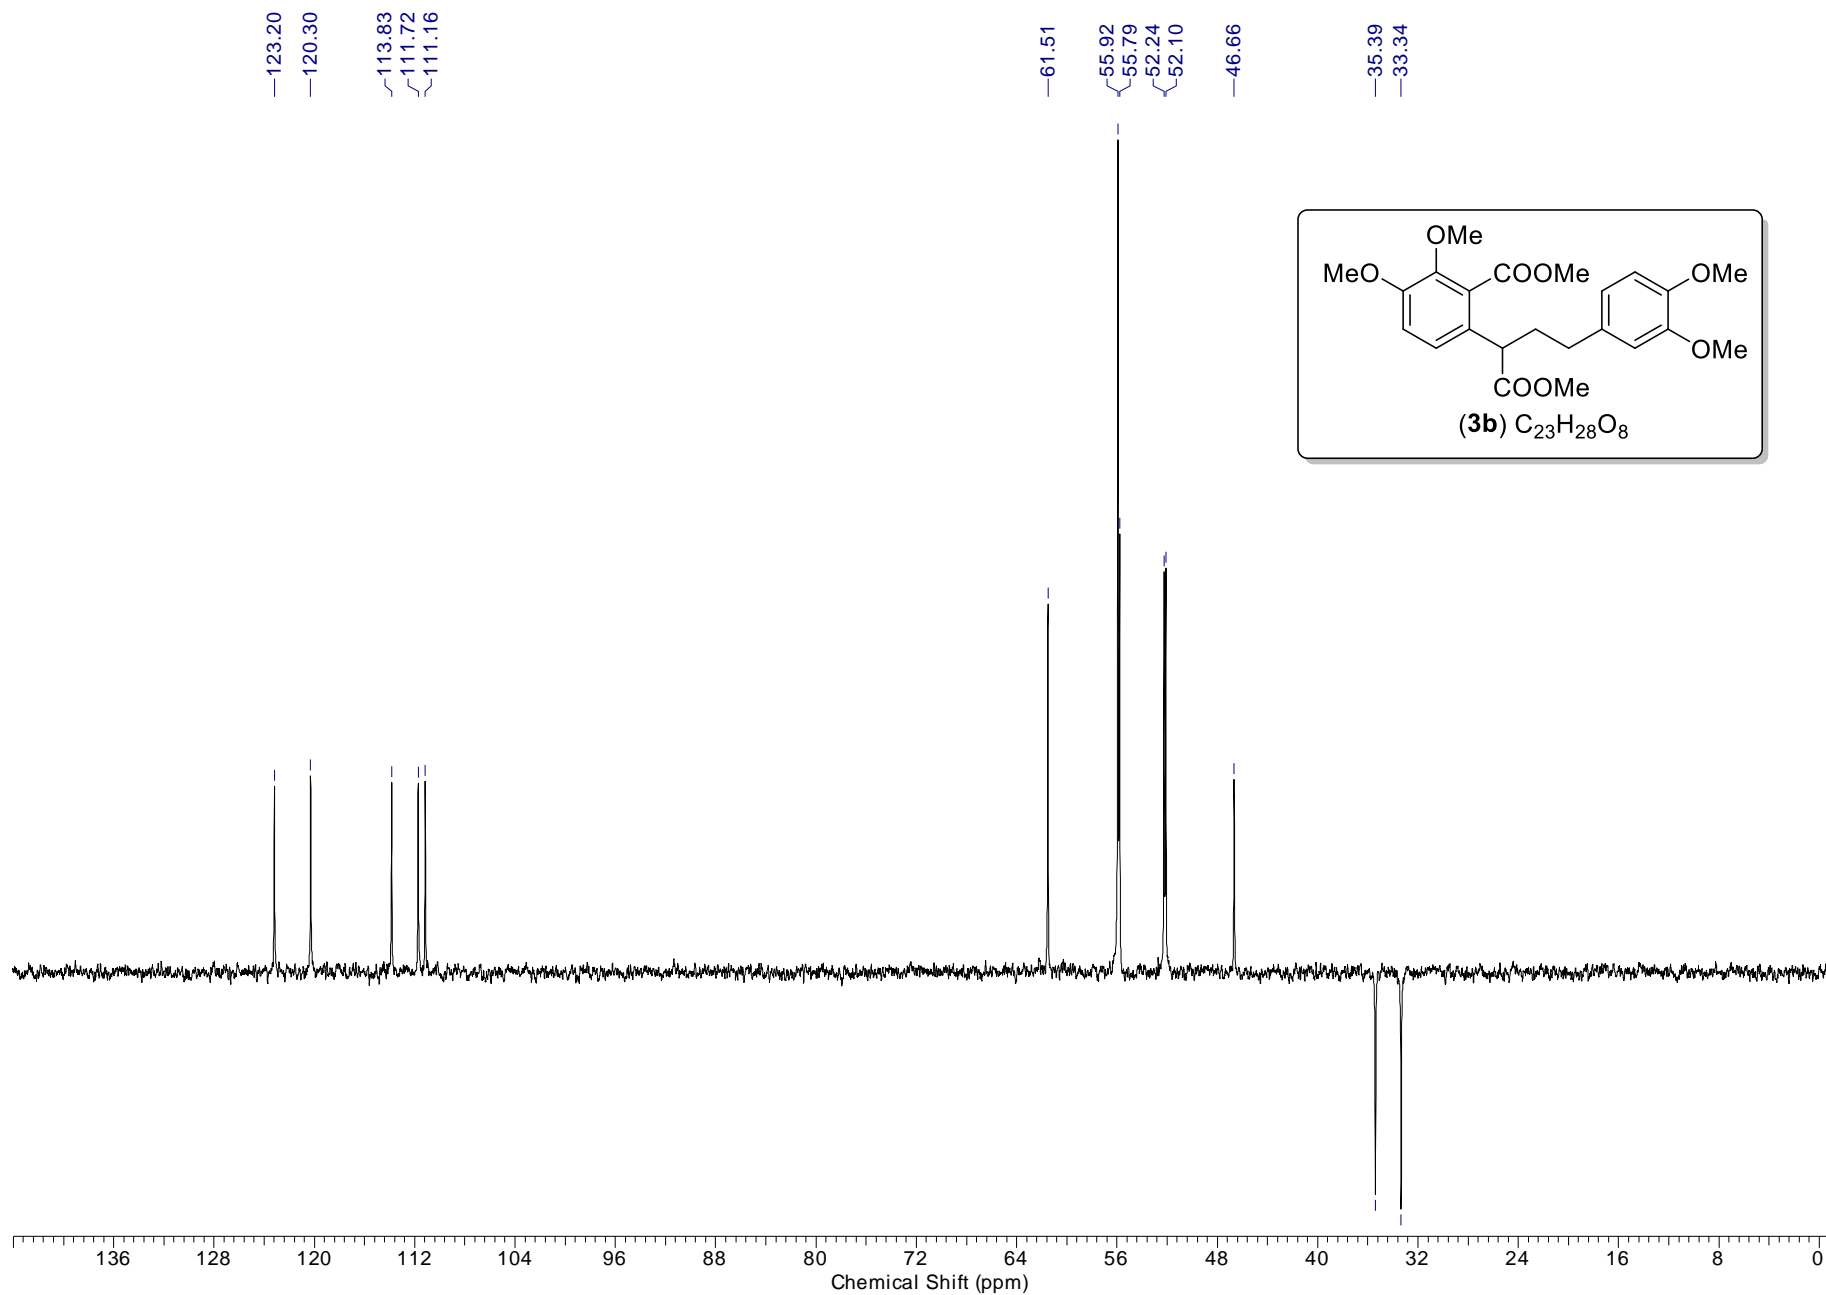

# SI-8

H-1 NMR 200 MHz  
CDCl<sub>3</sub>

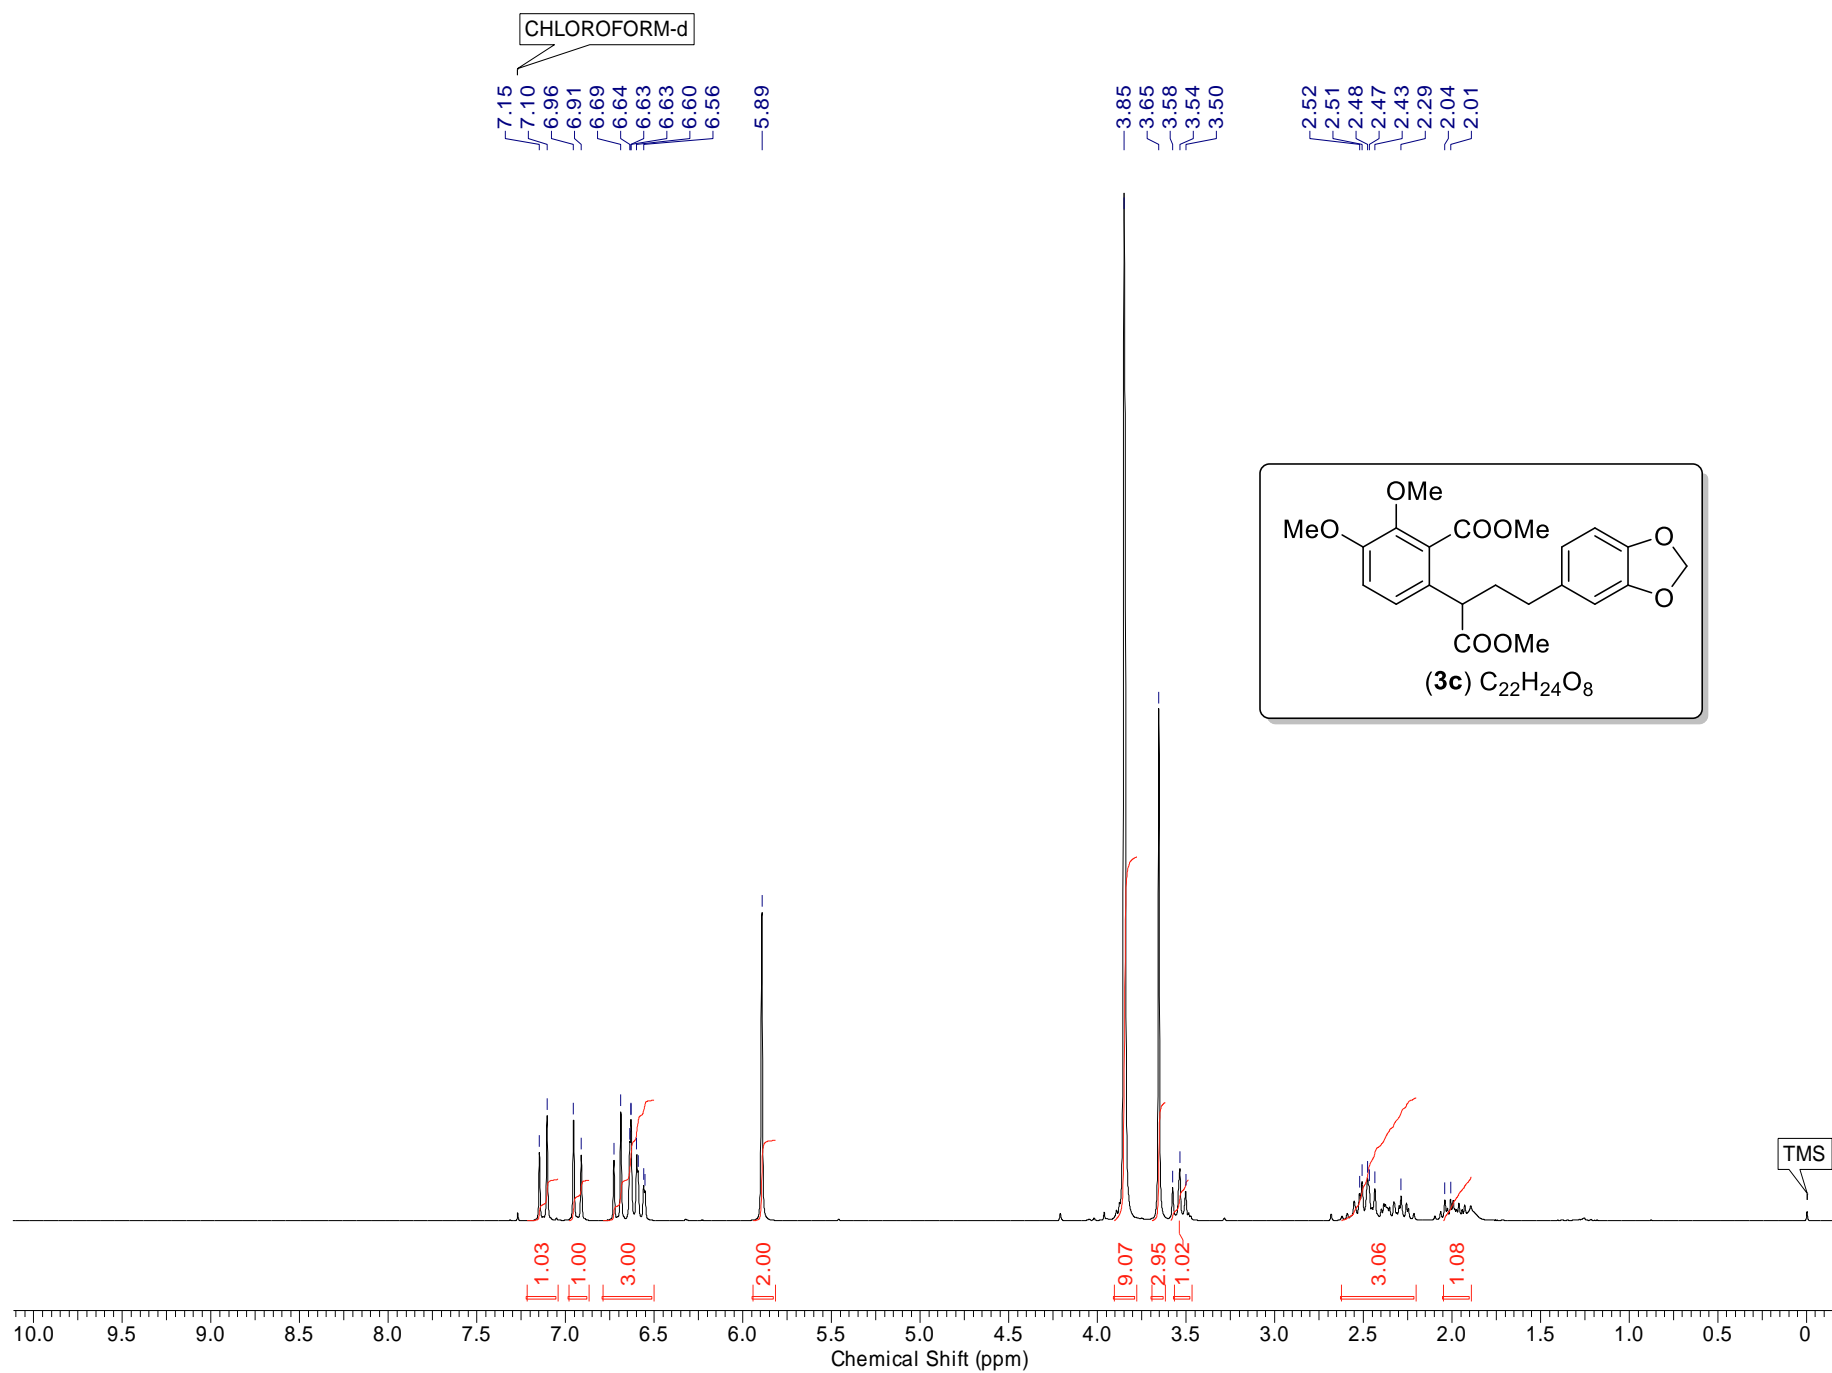



# SI-9

C-13 NMR 50 MHz  
CDCl<sub>3</sub>

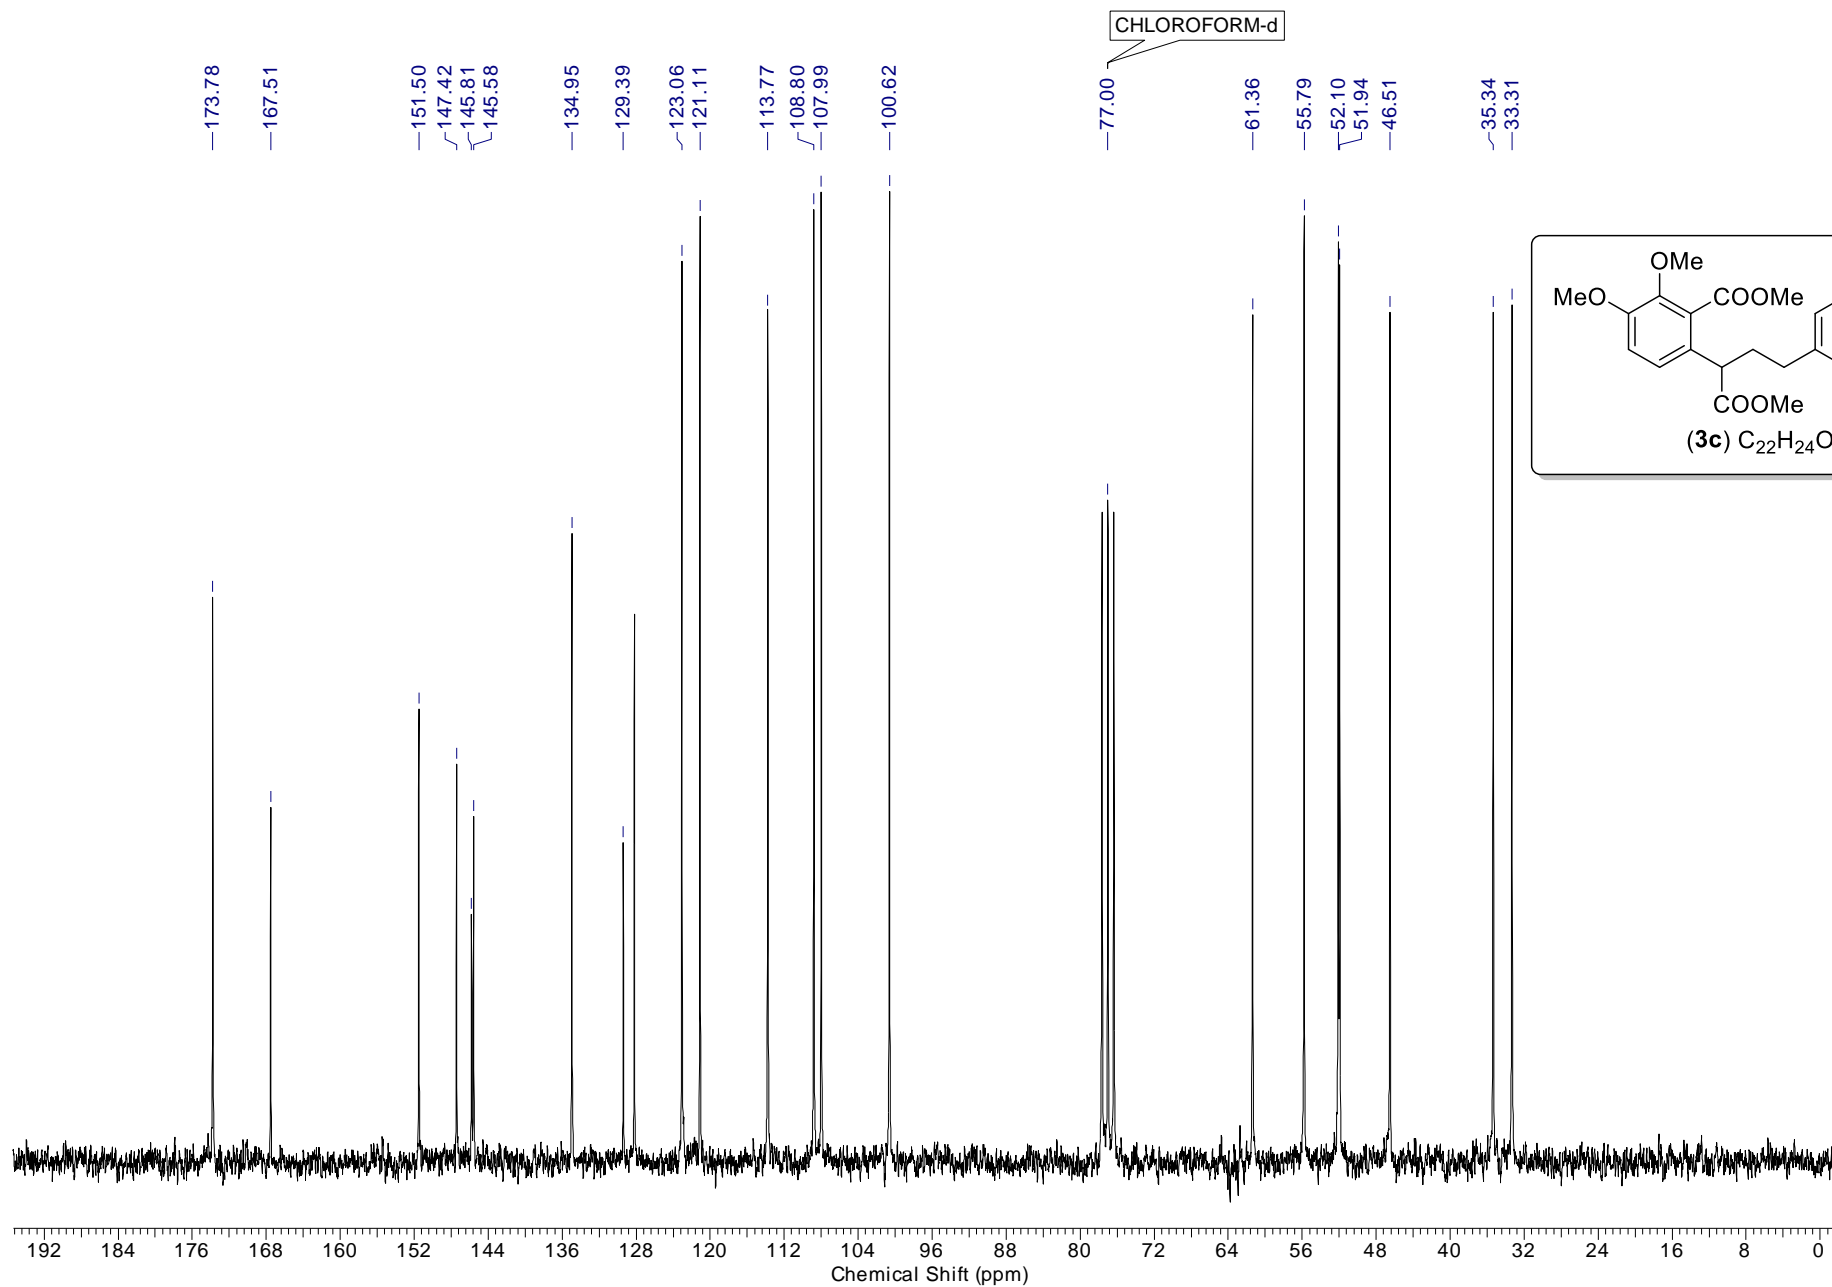

# SI-10

DEPT 50 MHz  
CDCl<sub>3</sub>

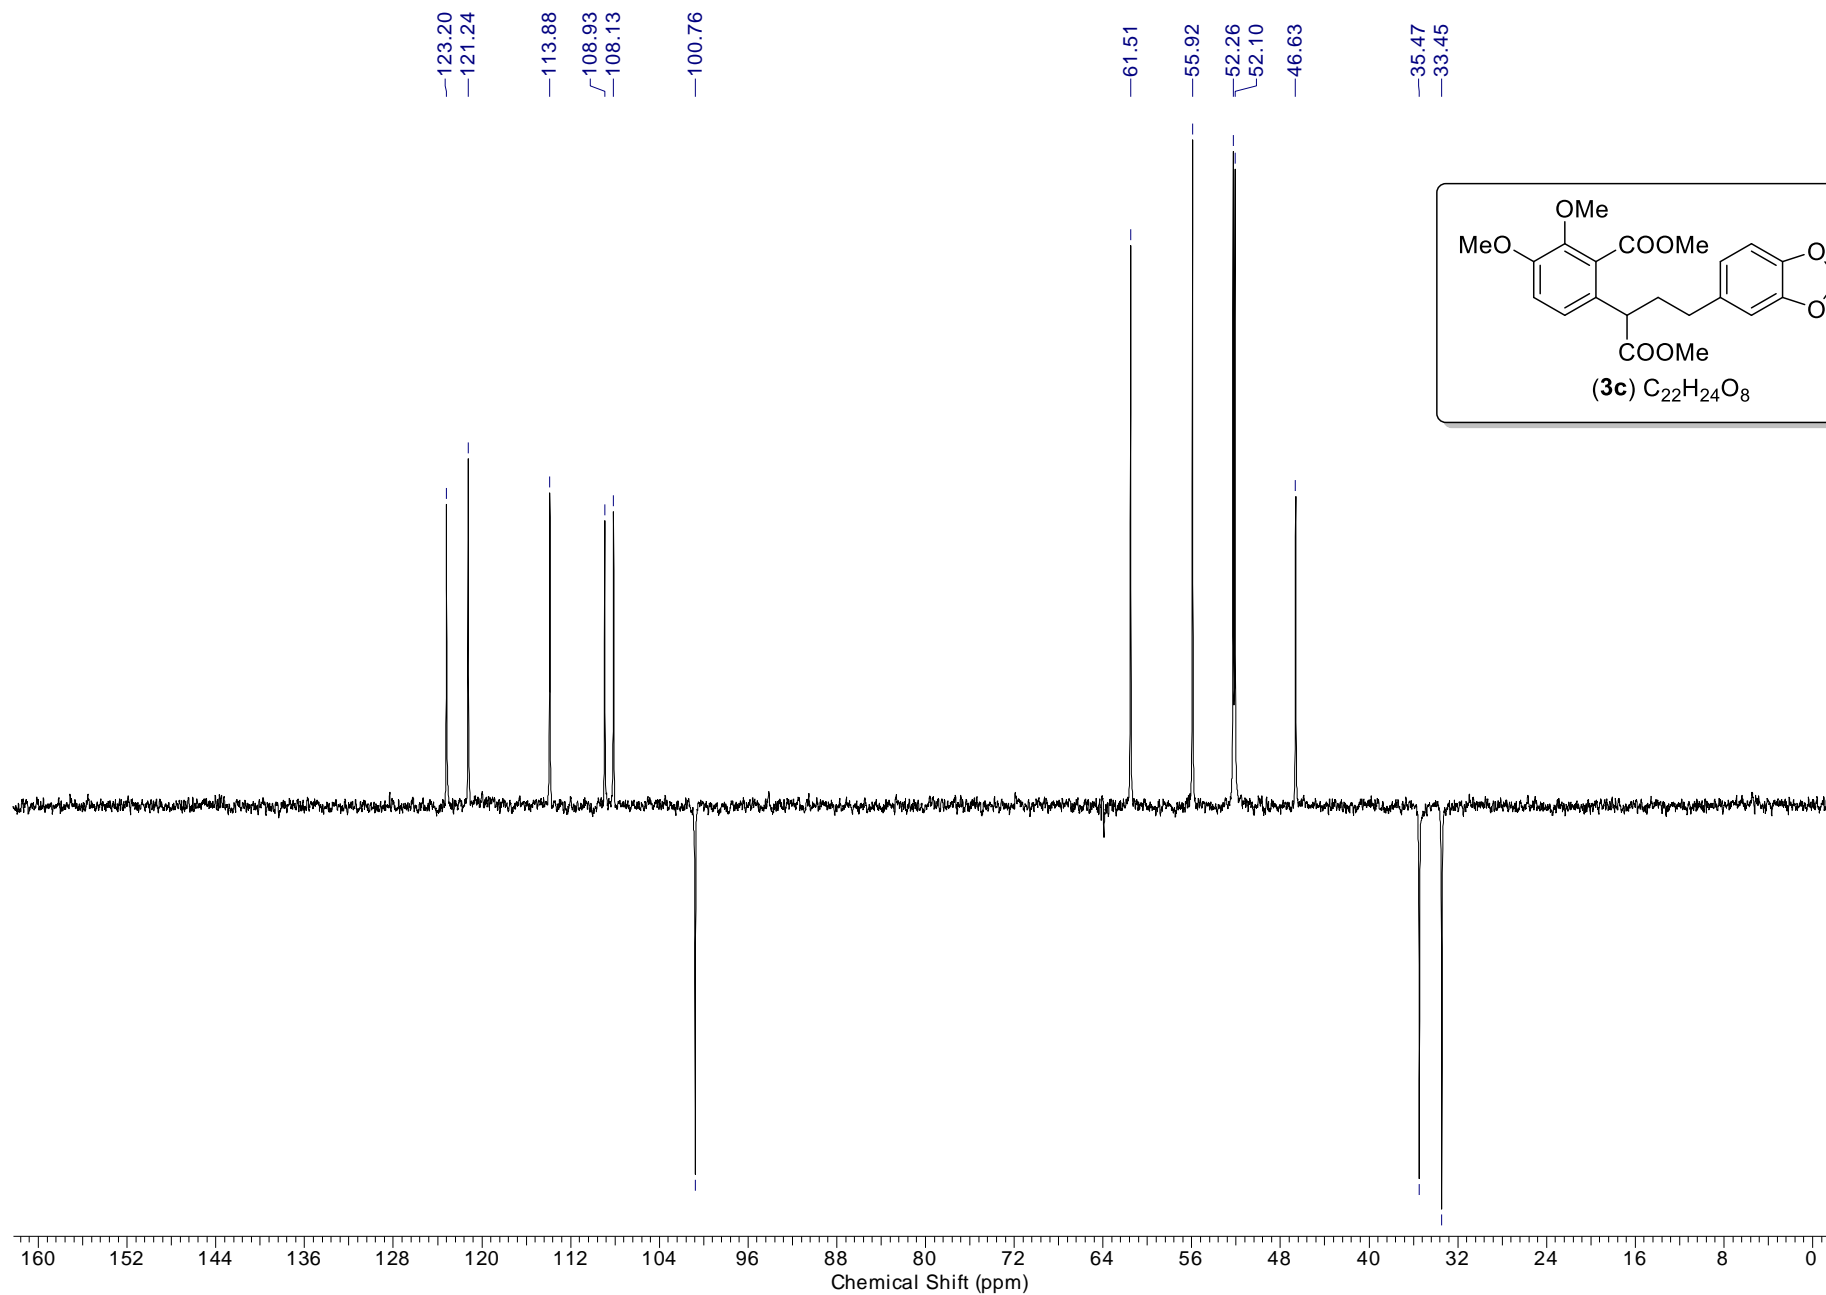

# SI-11

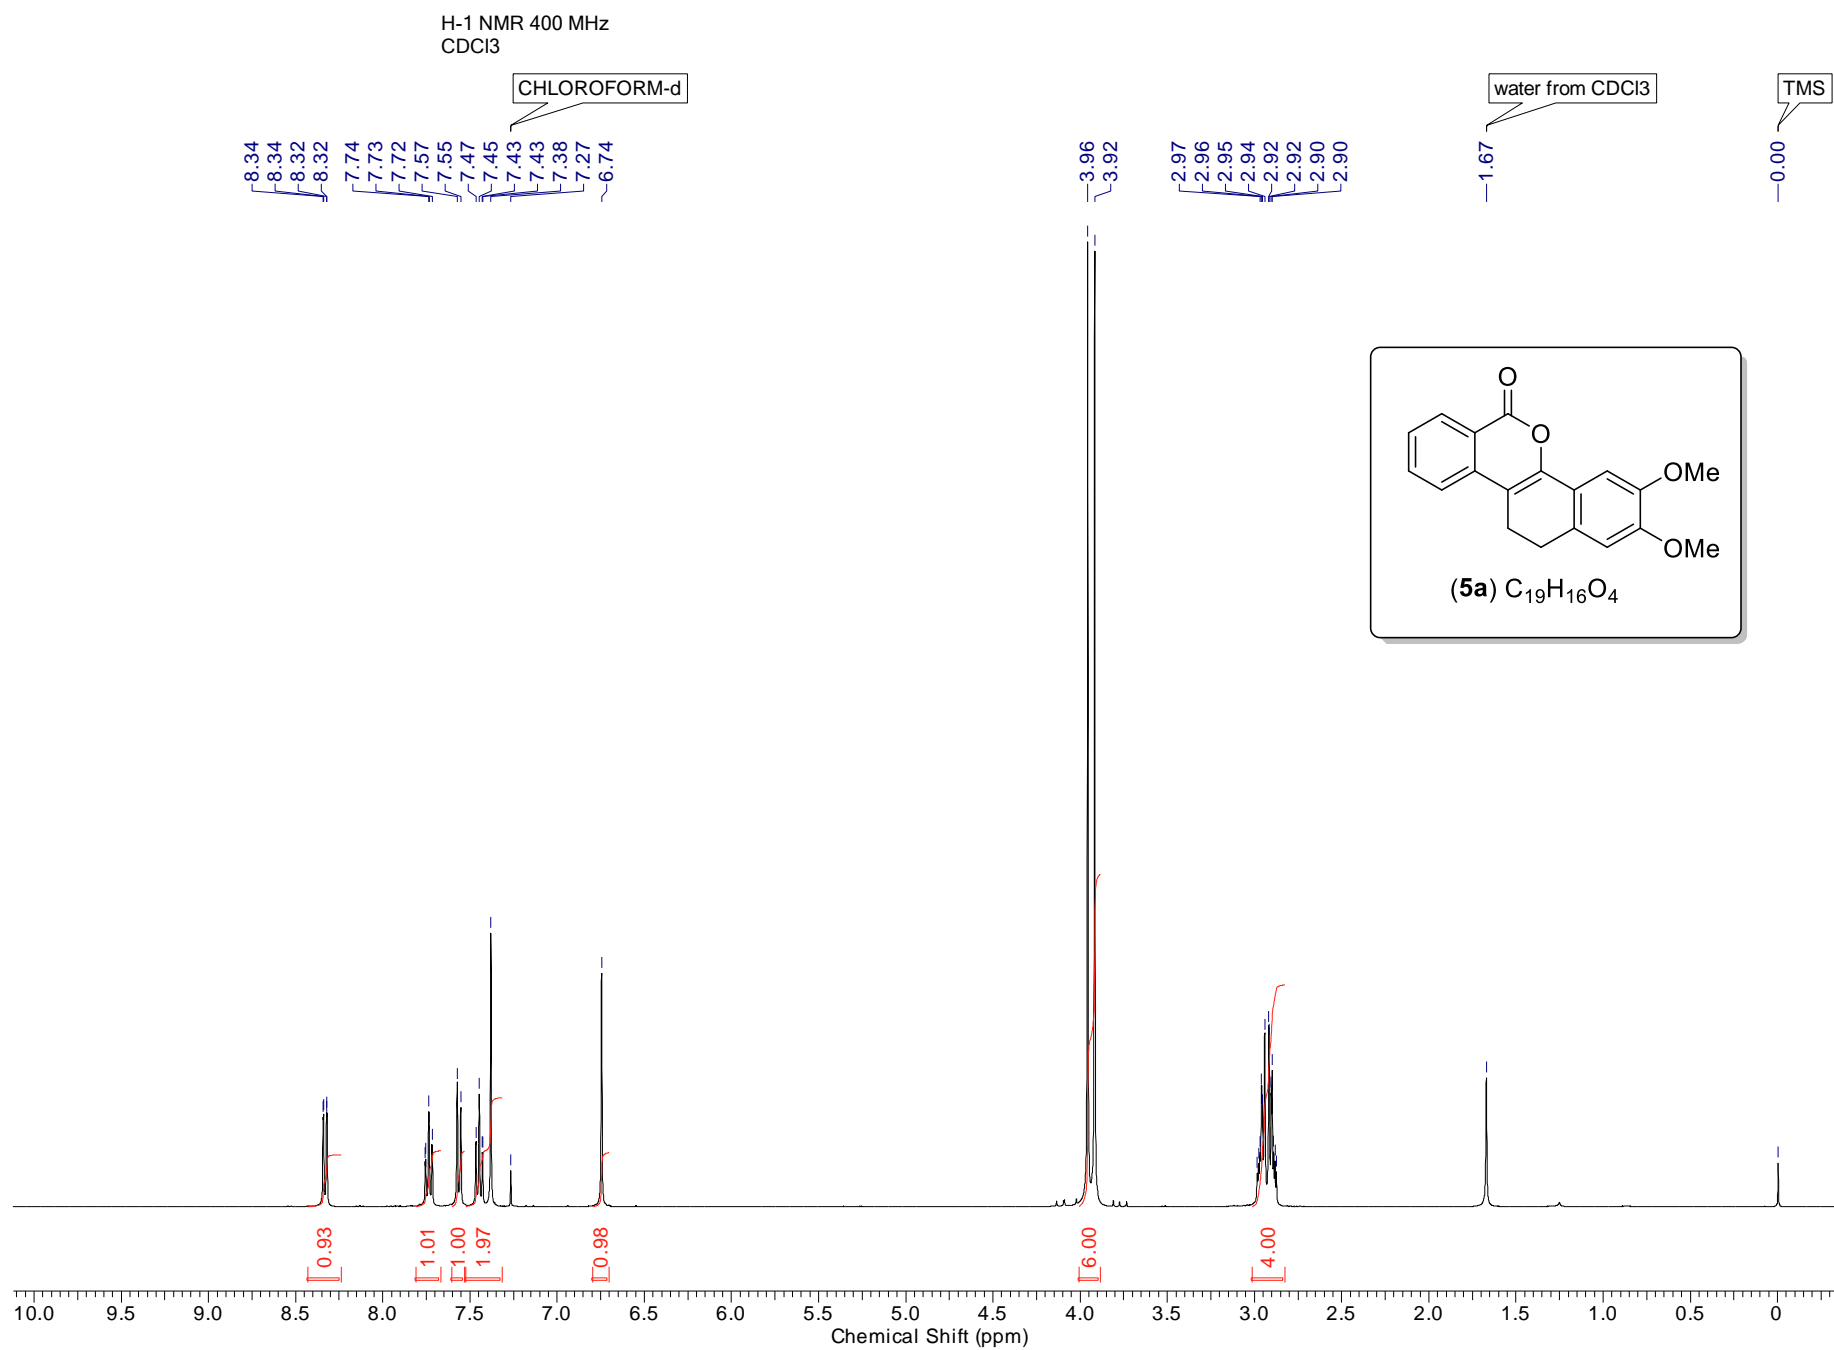

# SI-12

C-13 NMR 100 MHz  
CDCl<sub>3</sub>

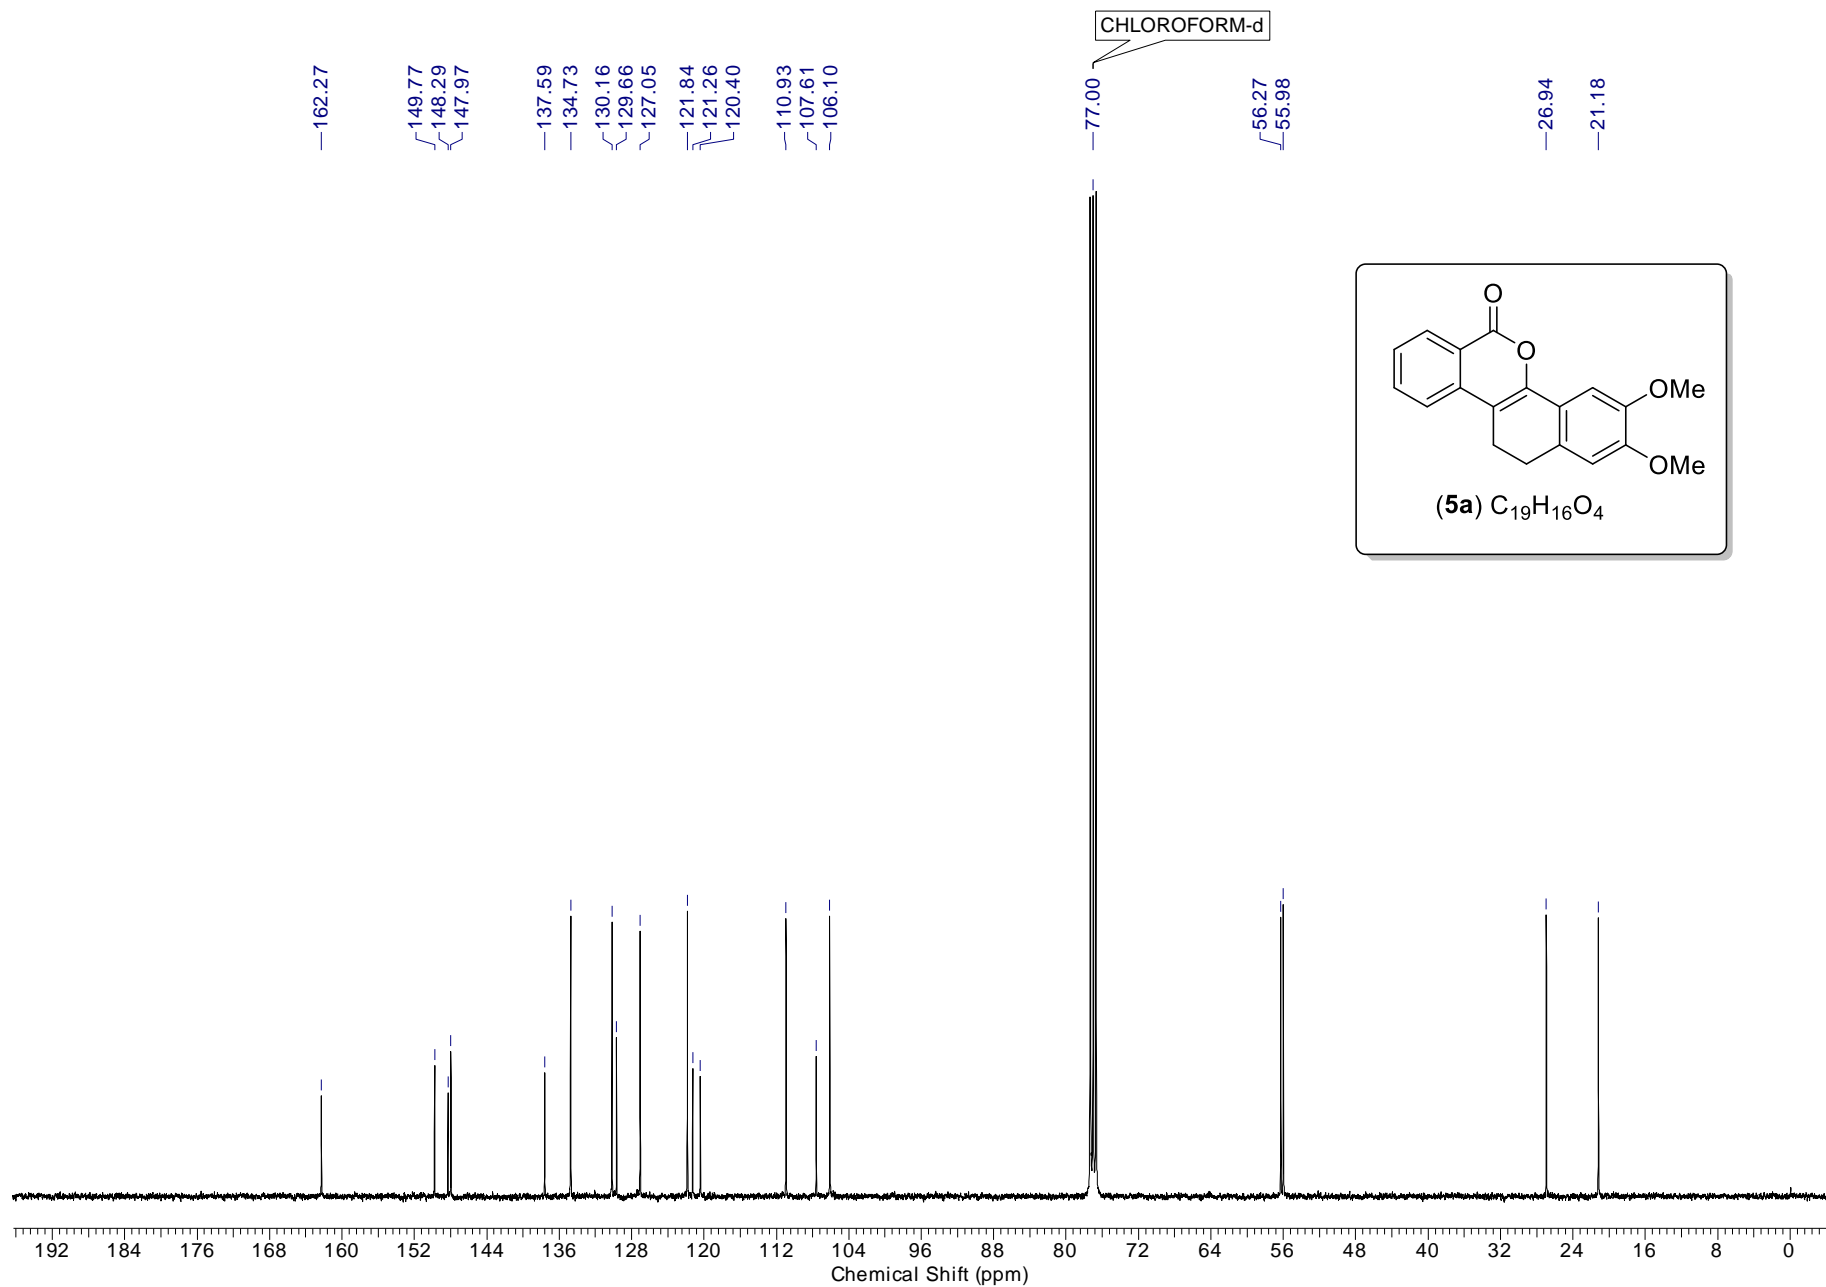

# SI-13

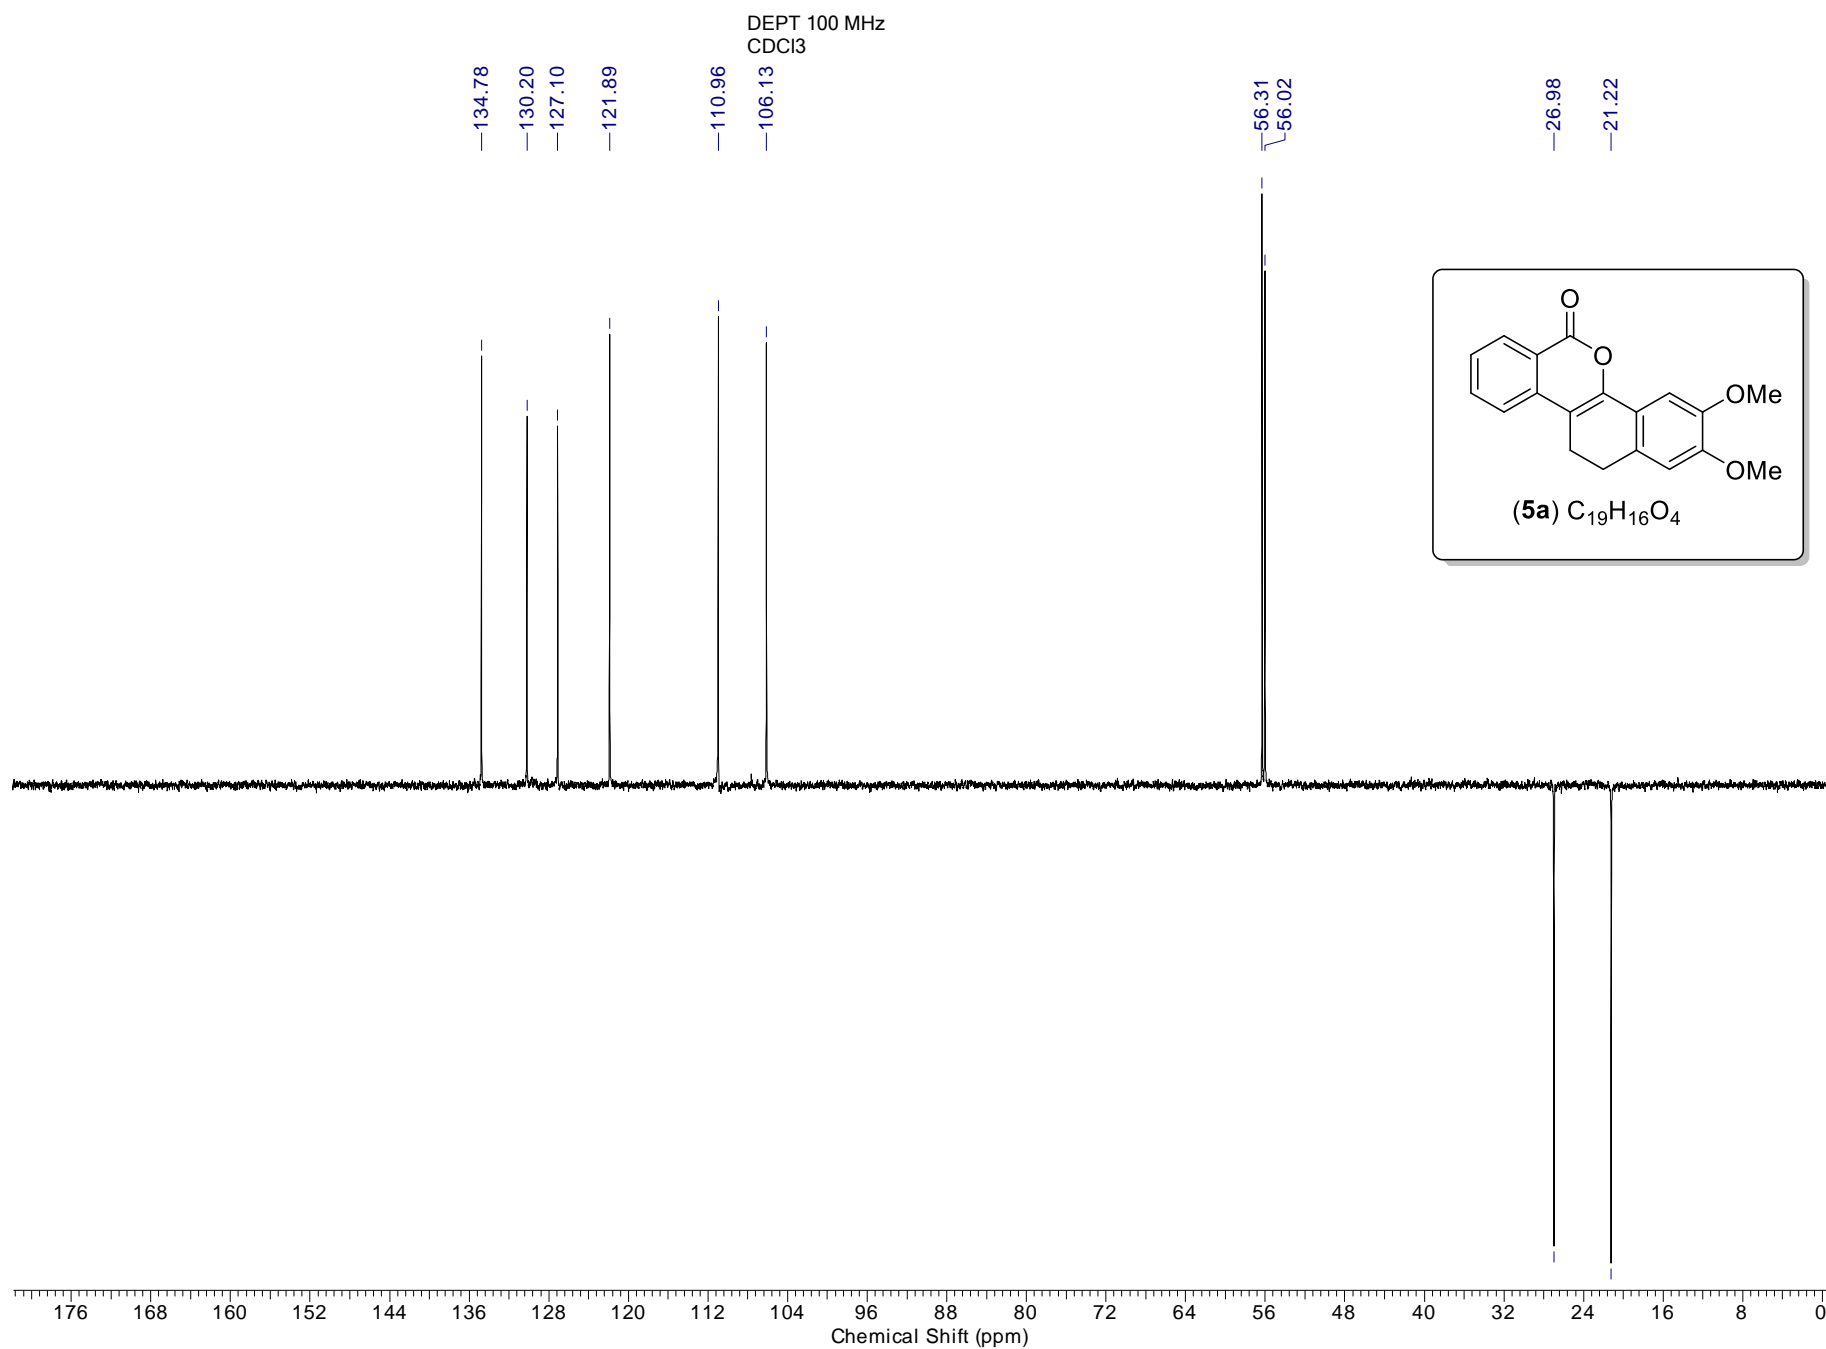

SI-14

H-1 NMR 200 MHz  
CDCl<sub>3</sub>

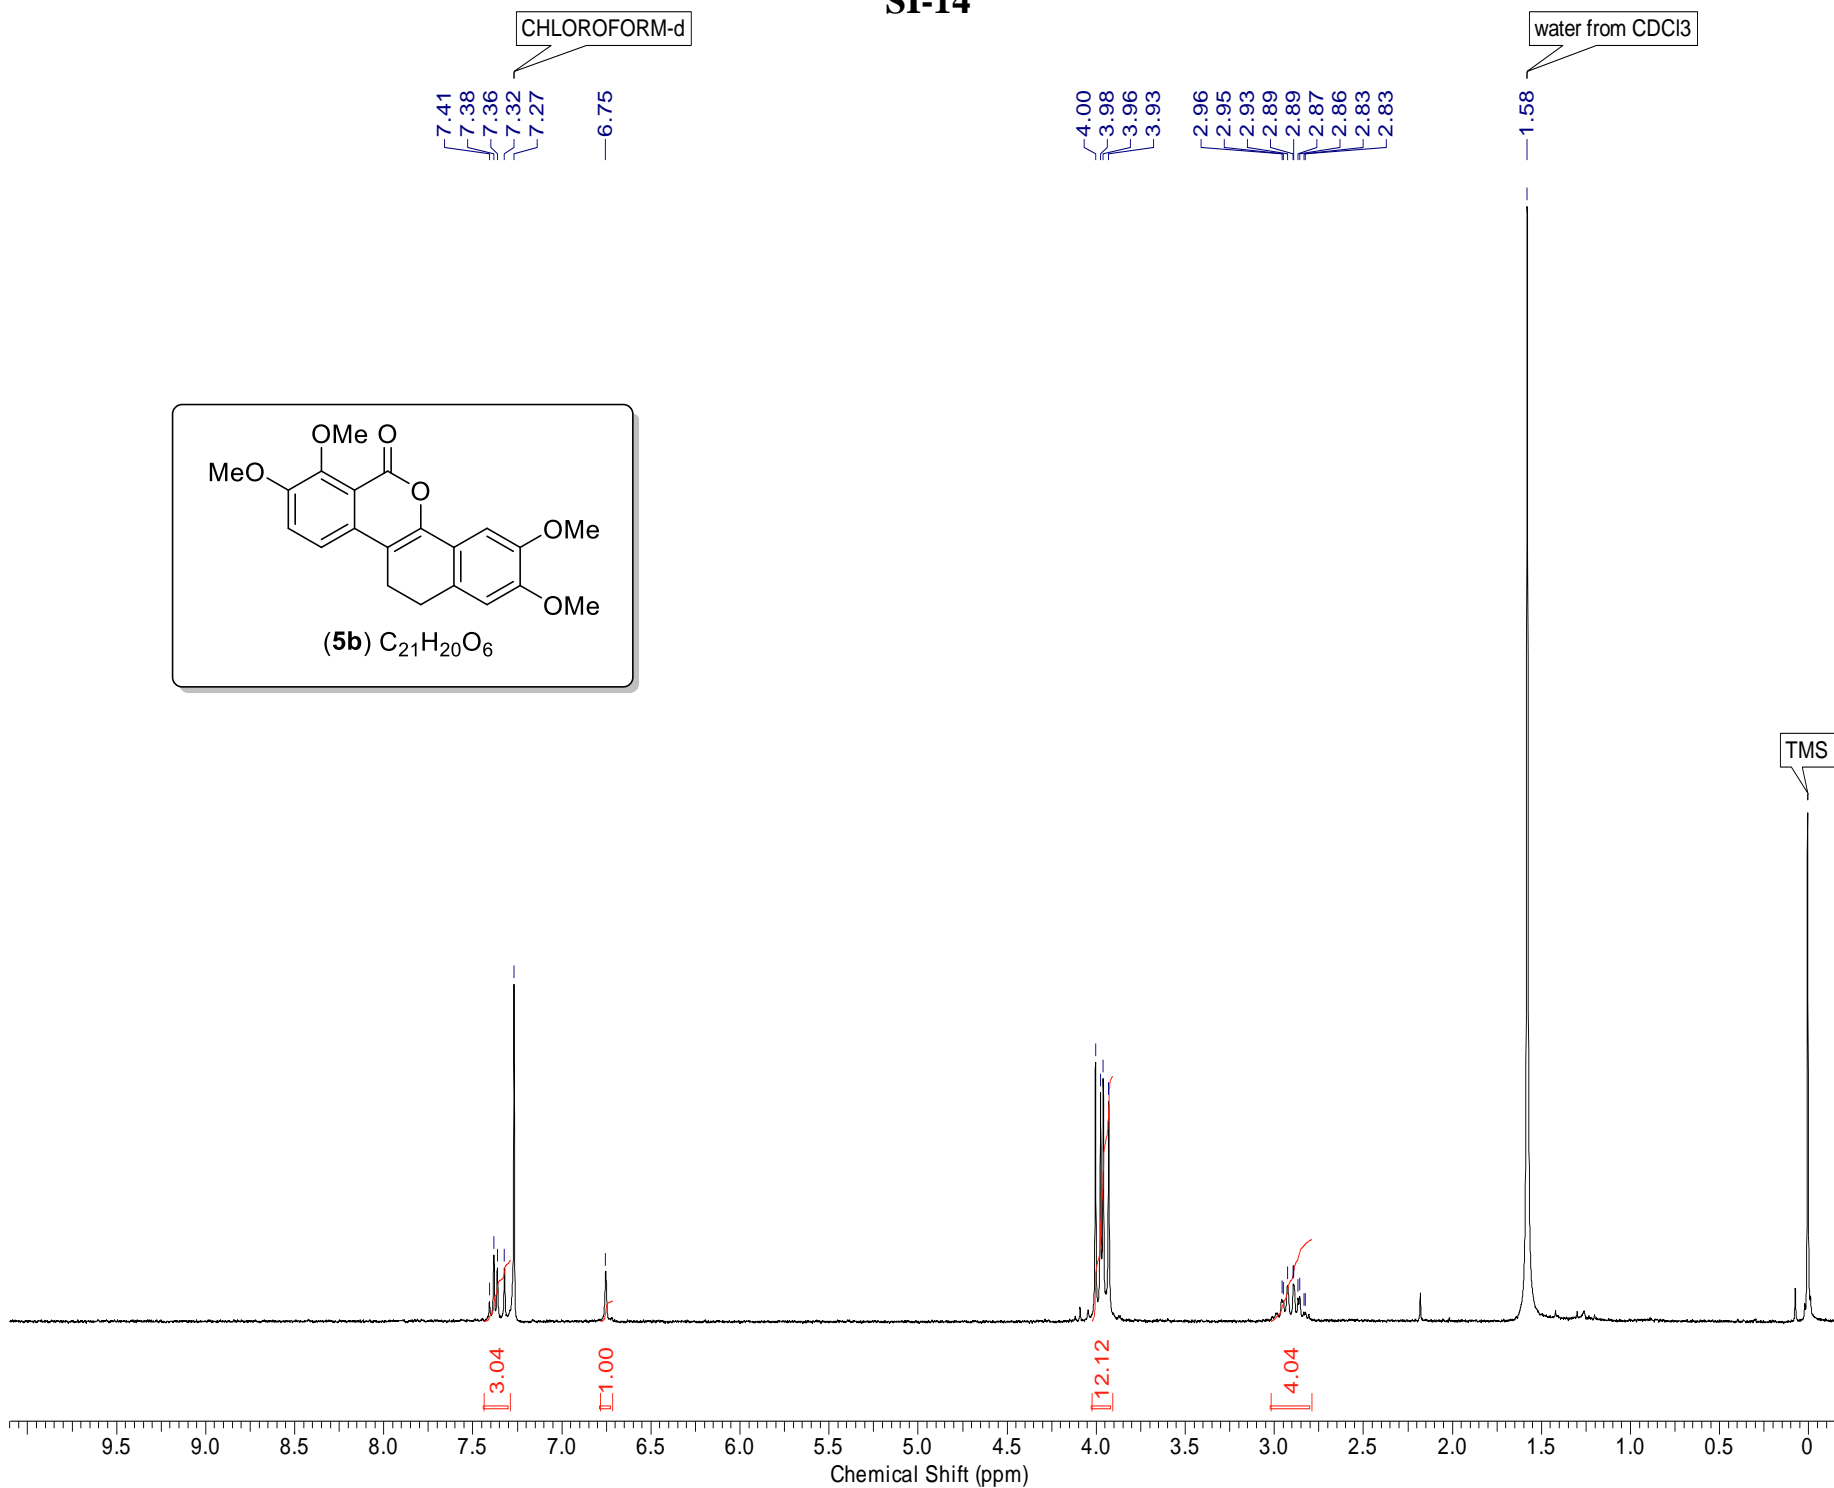

# SI-15

C-13 NMR 50 MHz  
CDCl<sub>3</sub>

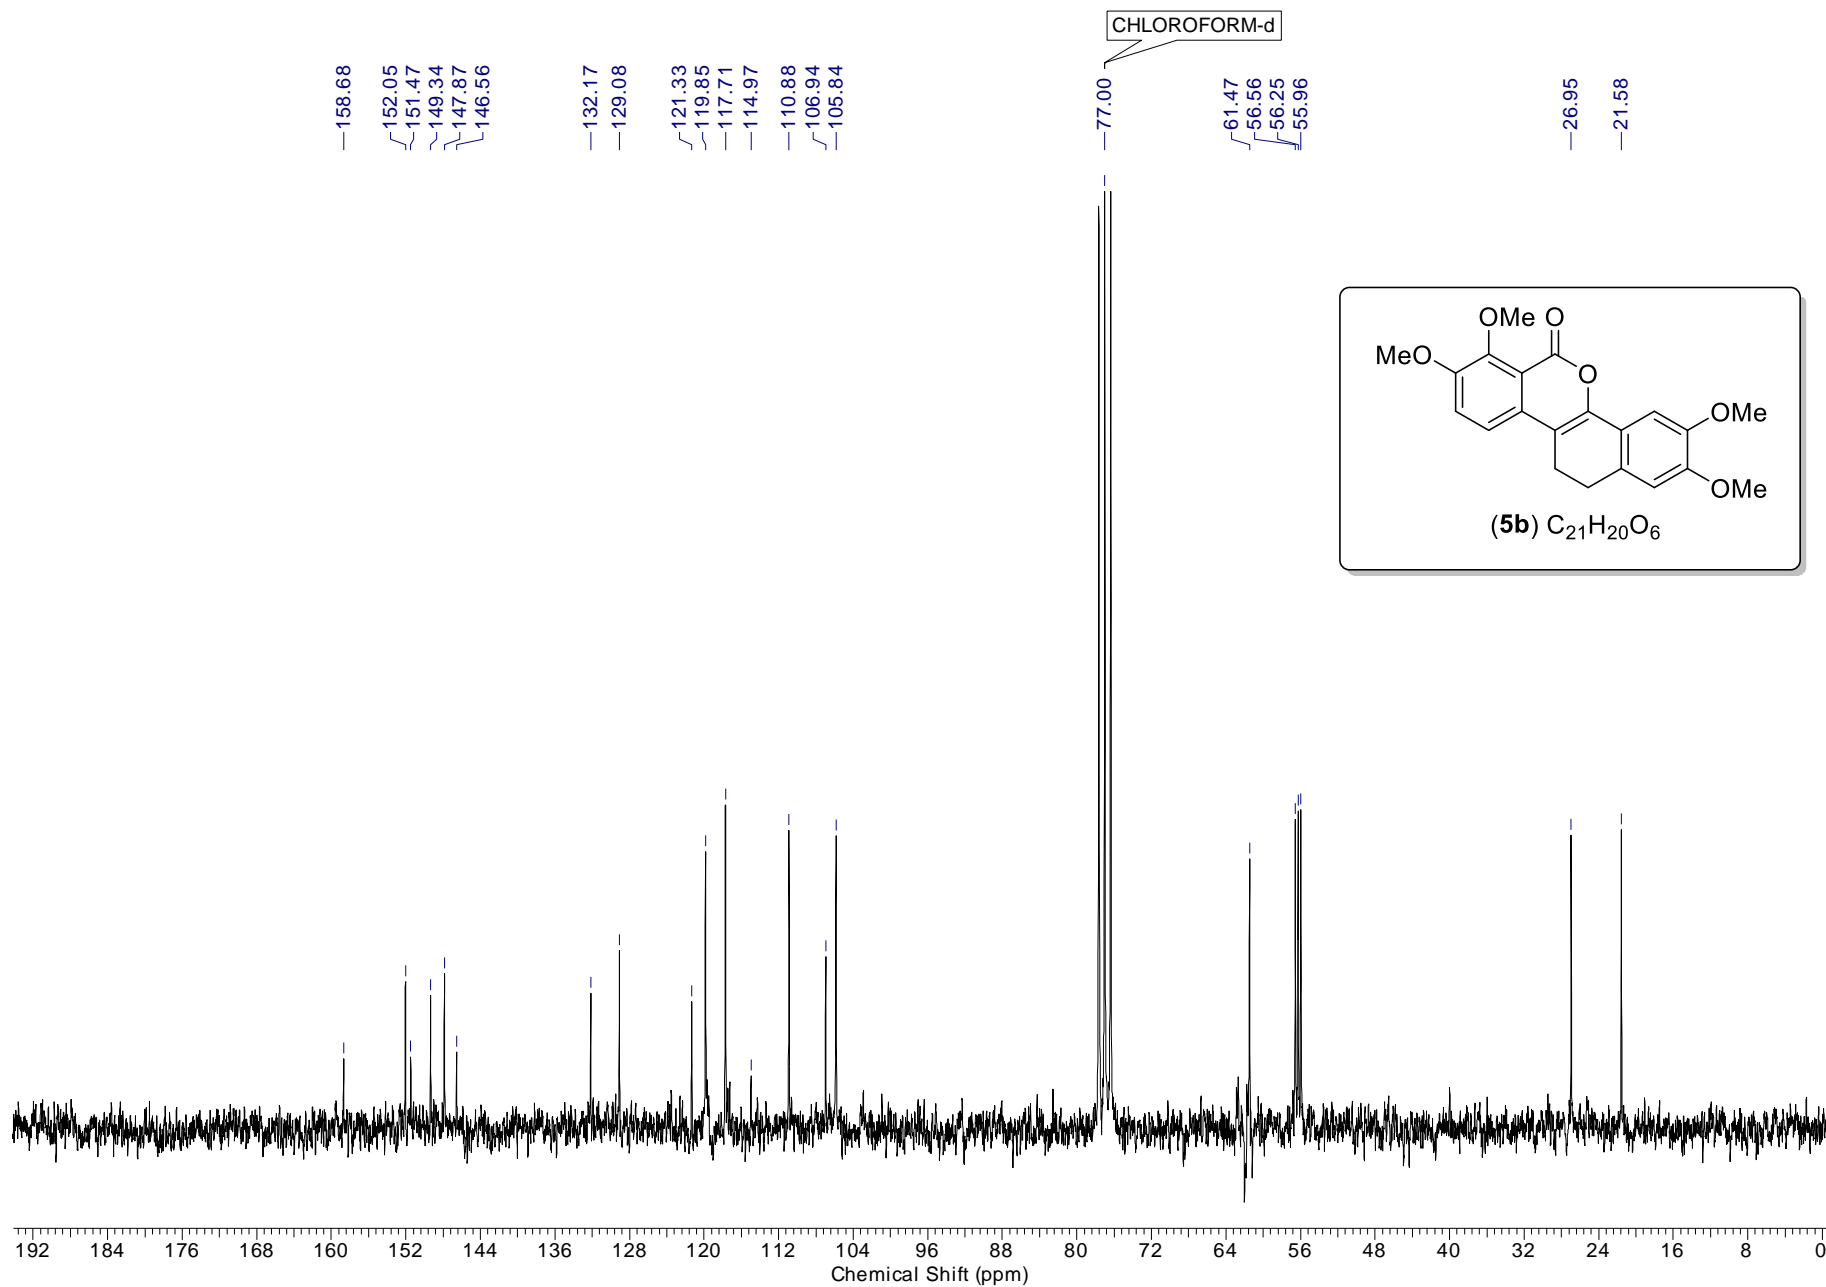

# SI-16

DEPT 50 MHz  
CDCl<sub>3</sub>

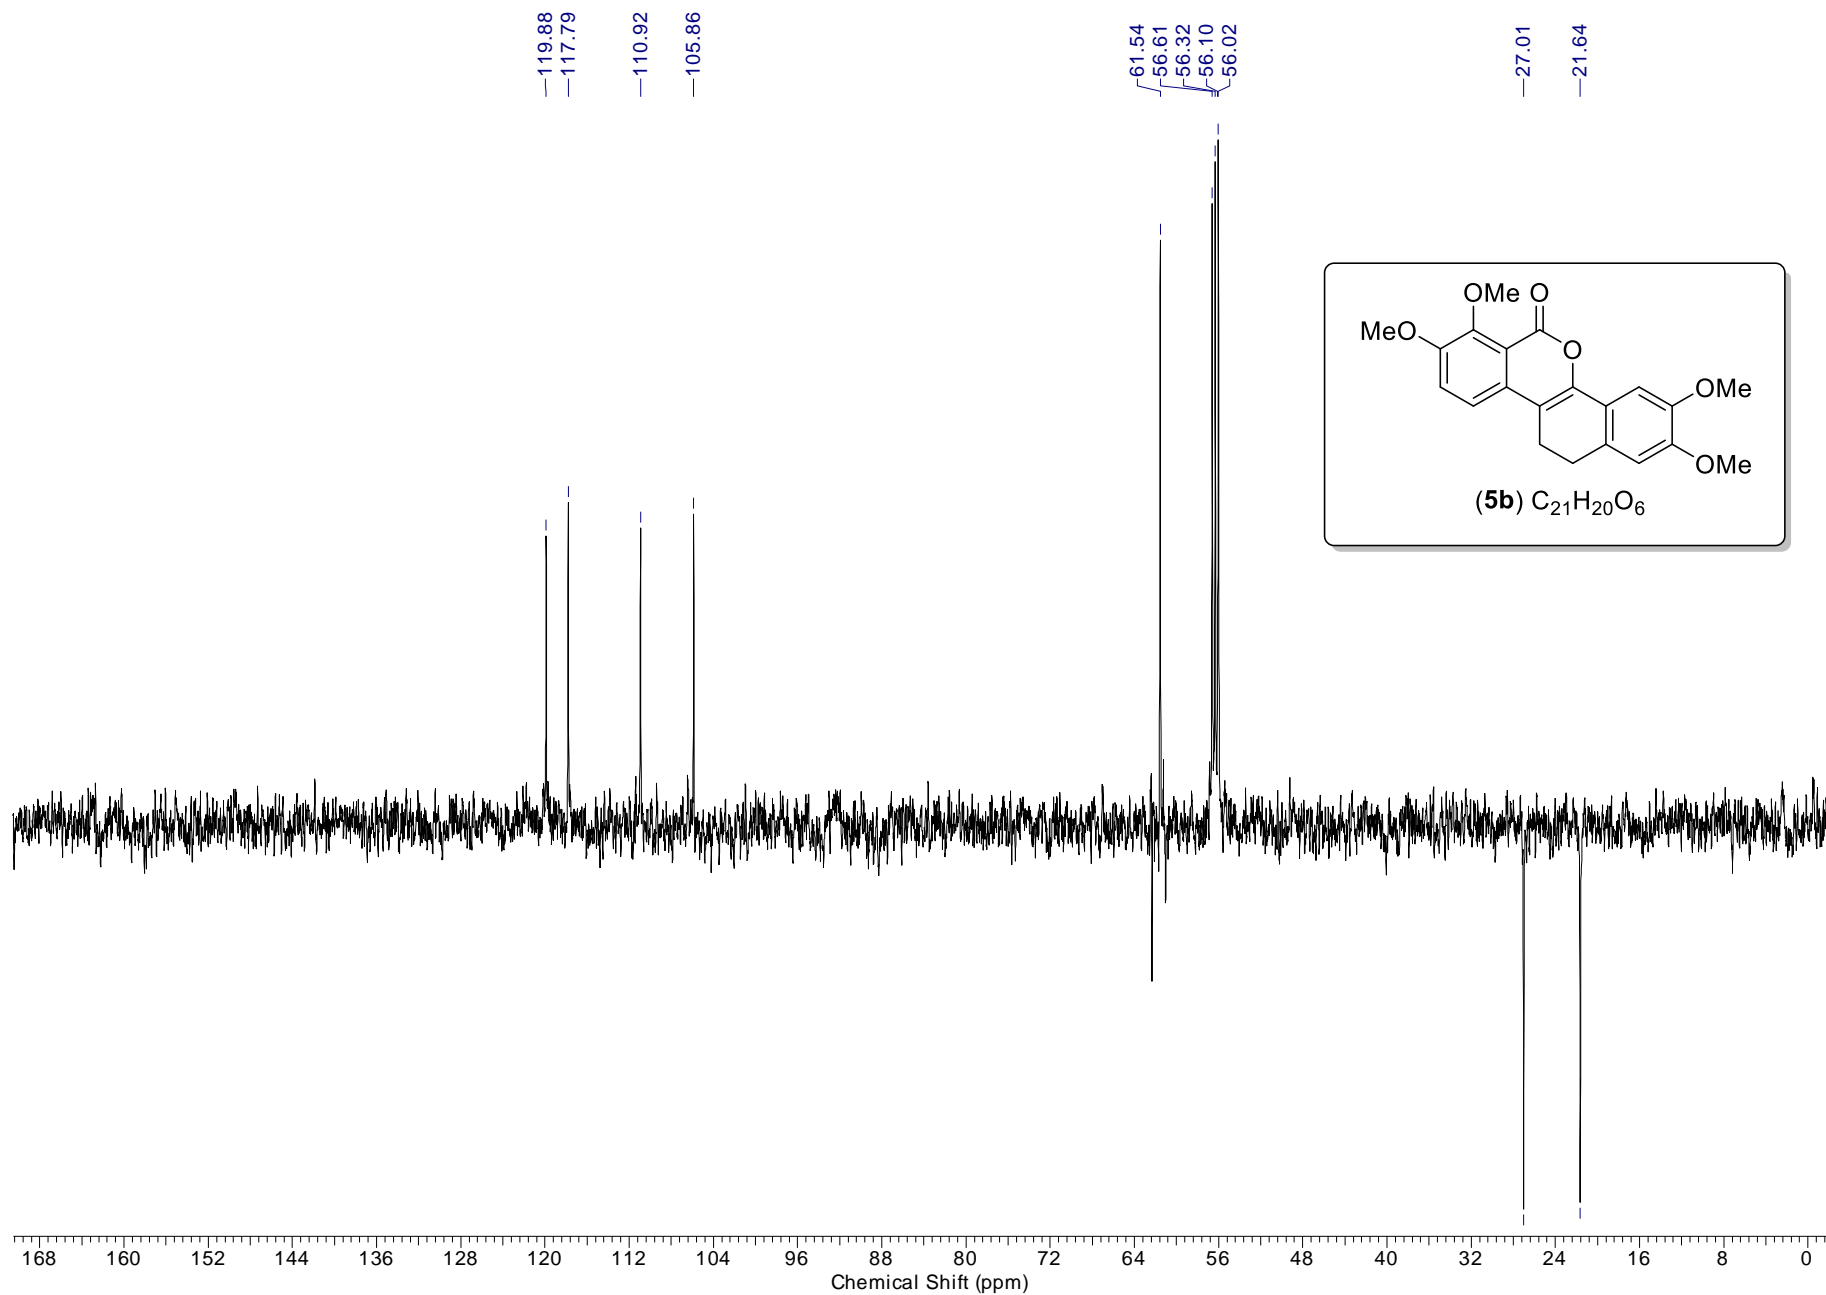



SI-17

H-1 NMR 200 MHz  
CDCl<sub>3</sub>

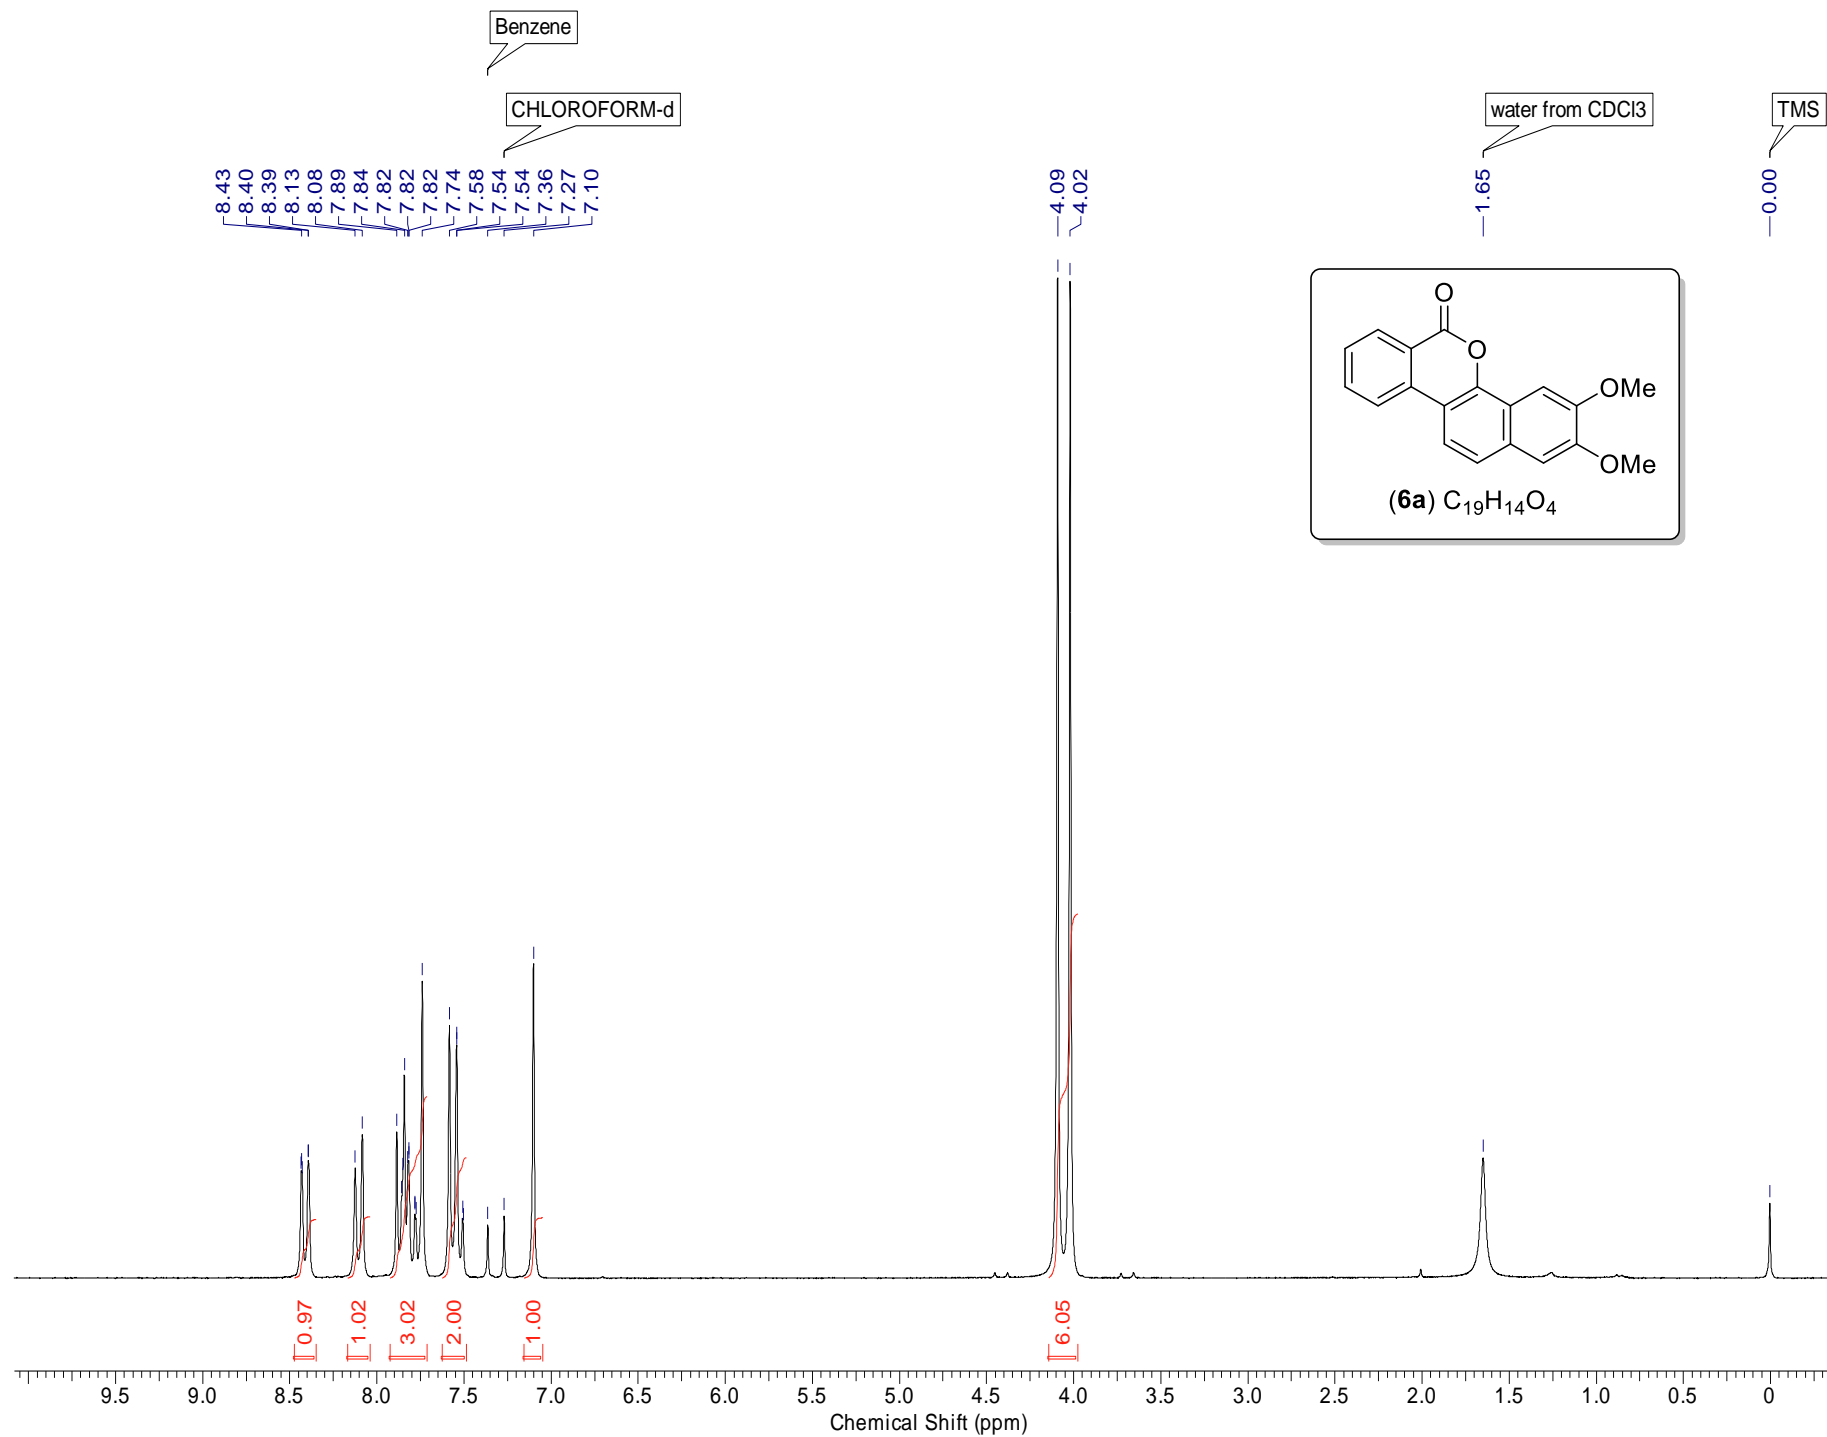

# SI-18

C-13 NMR 50 MHz  
CDCl<sub>3</sub>

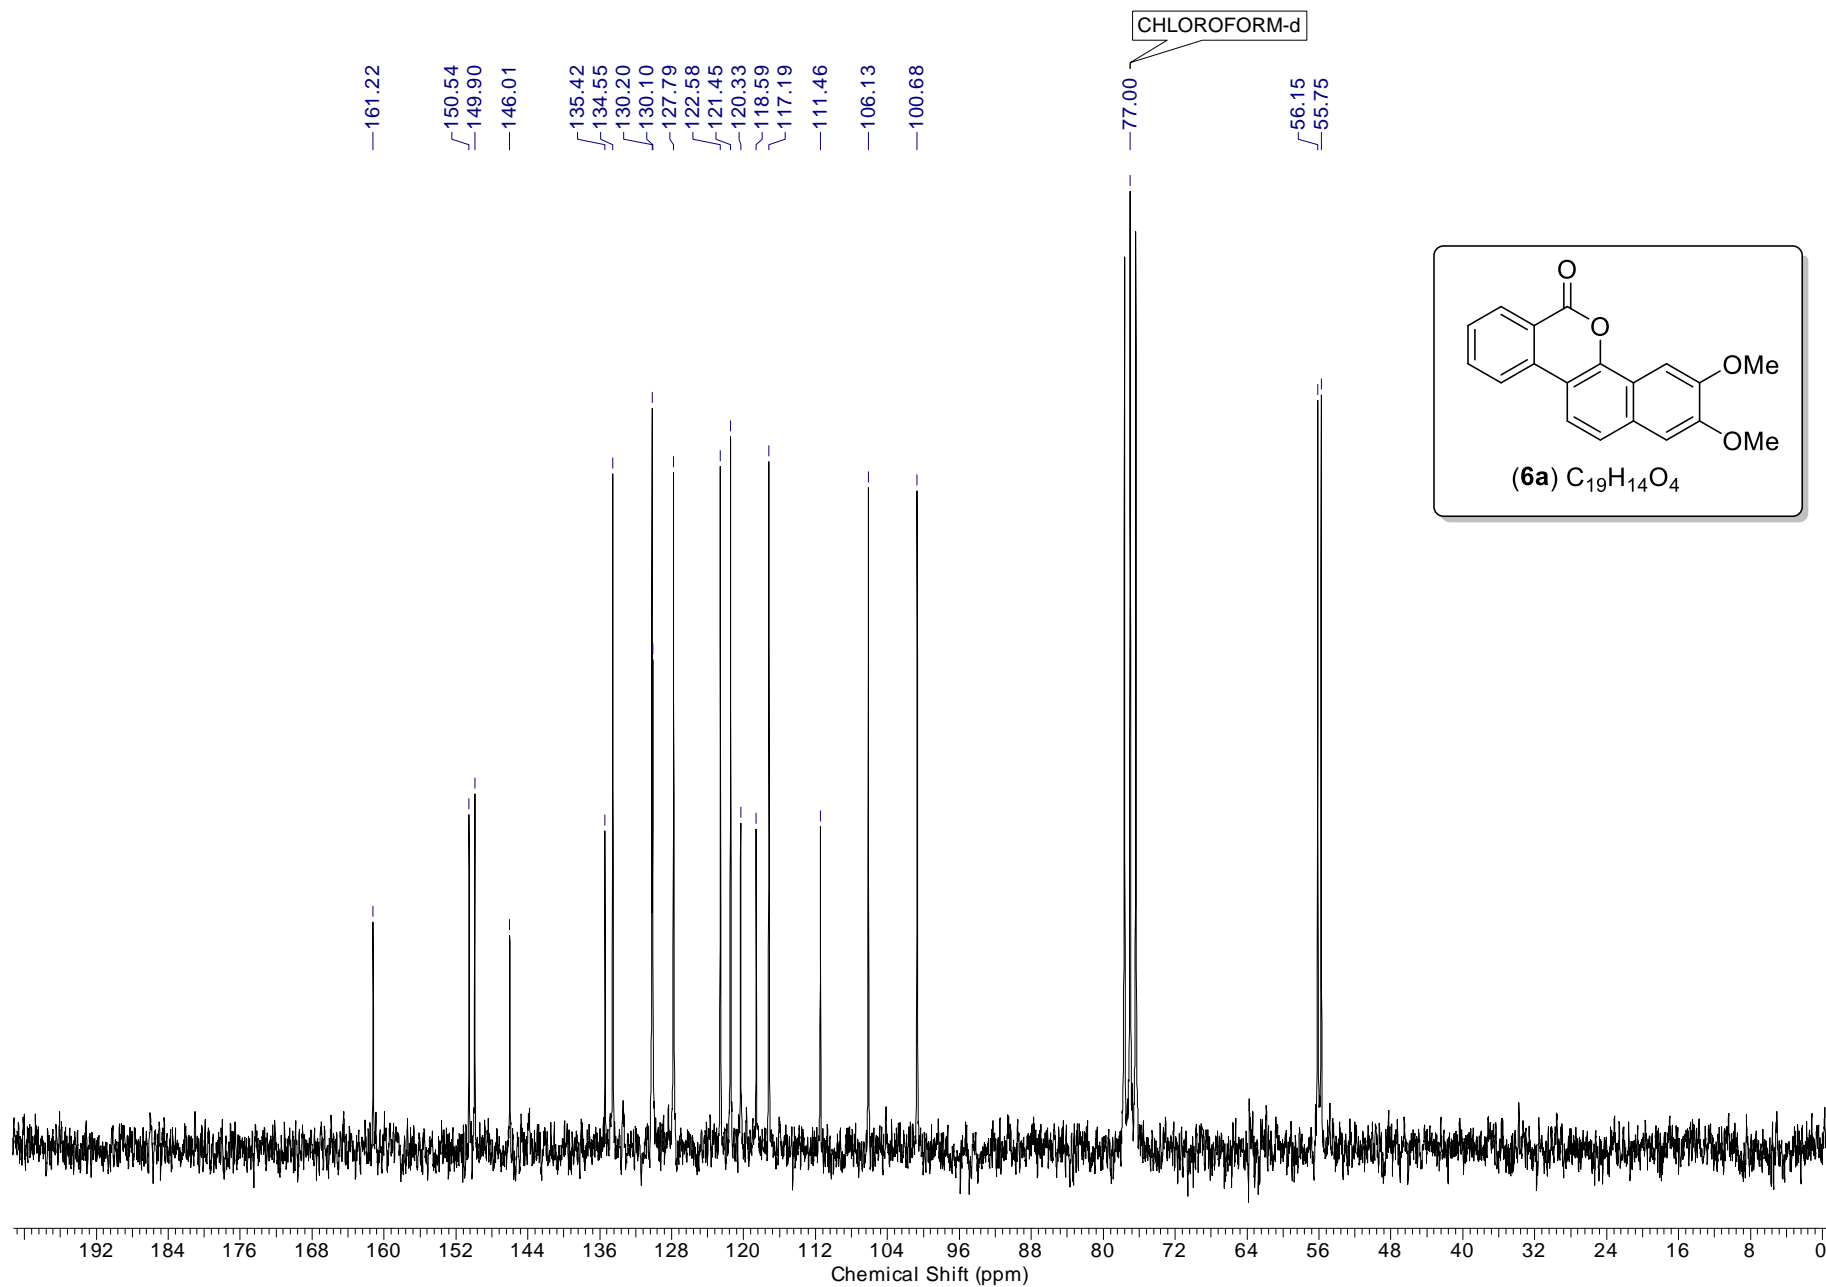

# SI-19

DEPT 50 MHz  
CDCl<sub>3</sub>

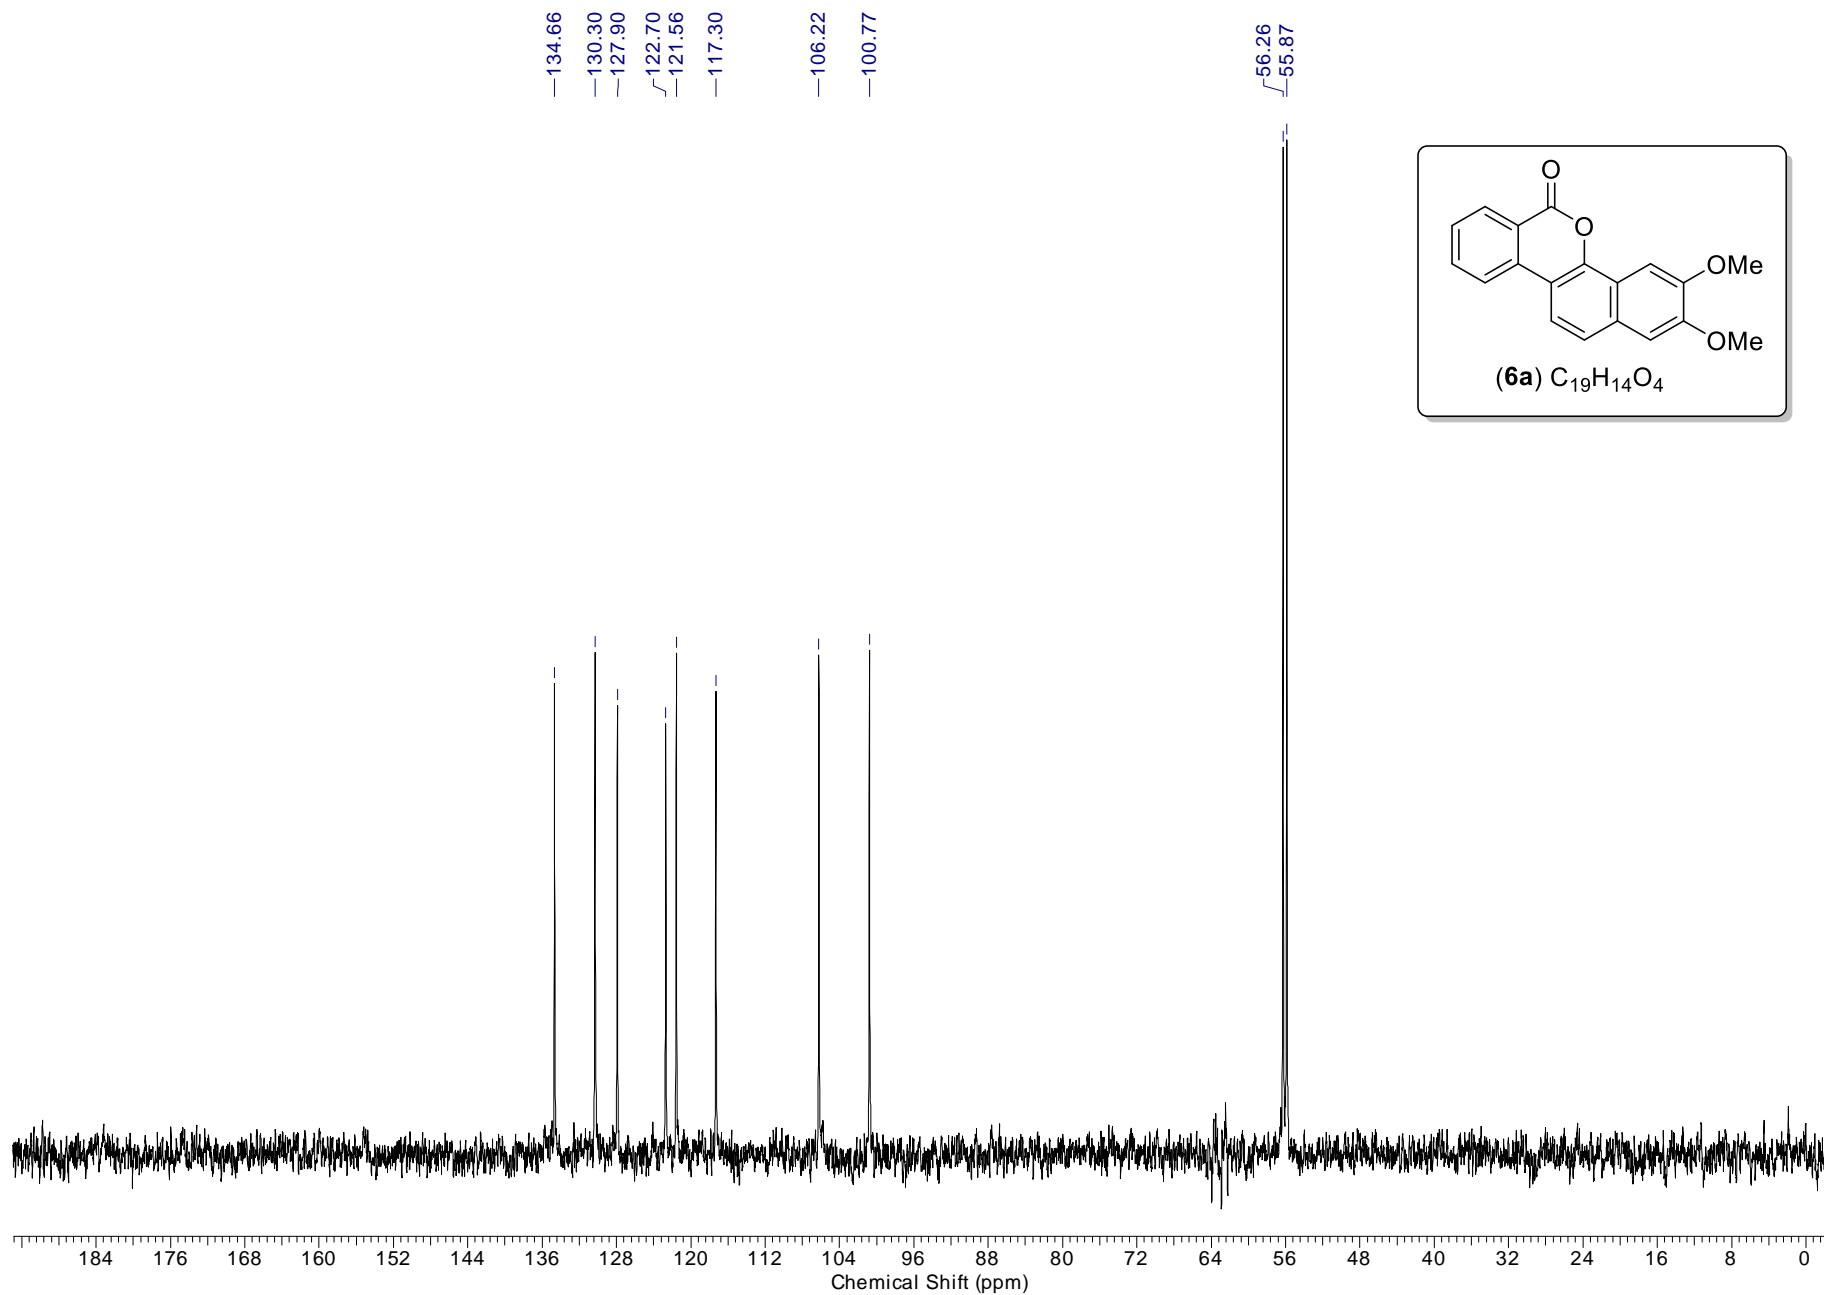

SI-20

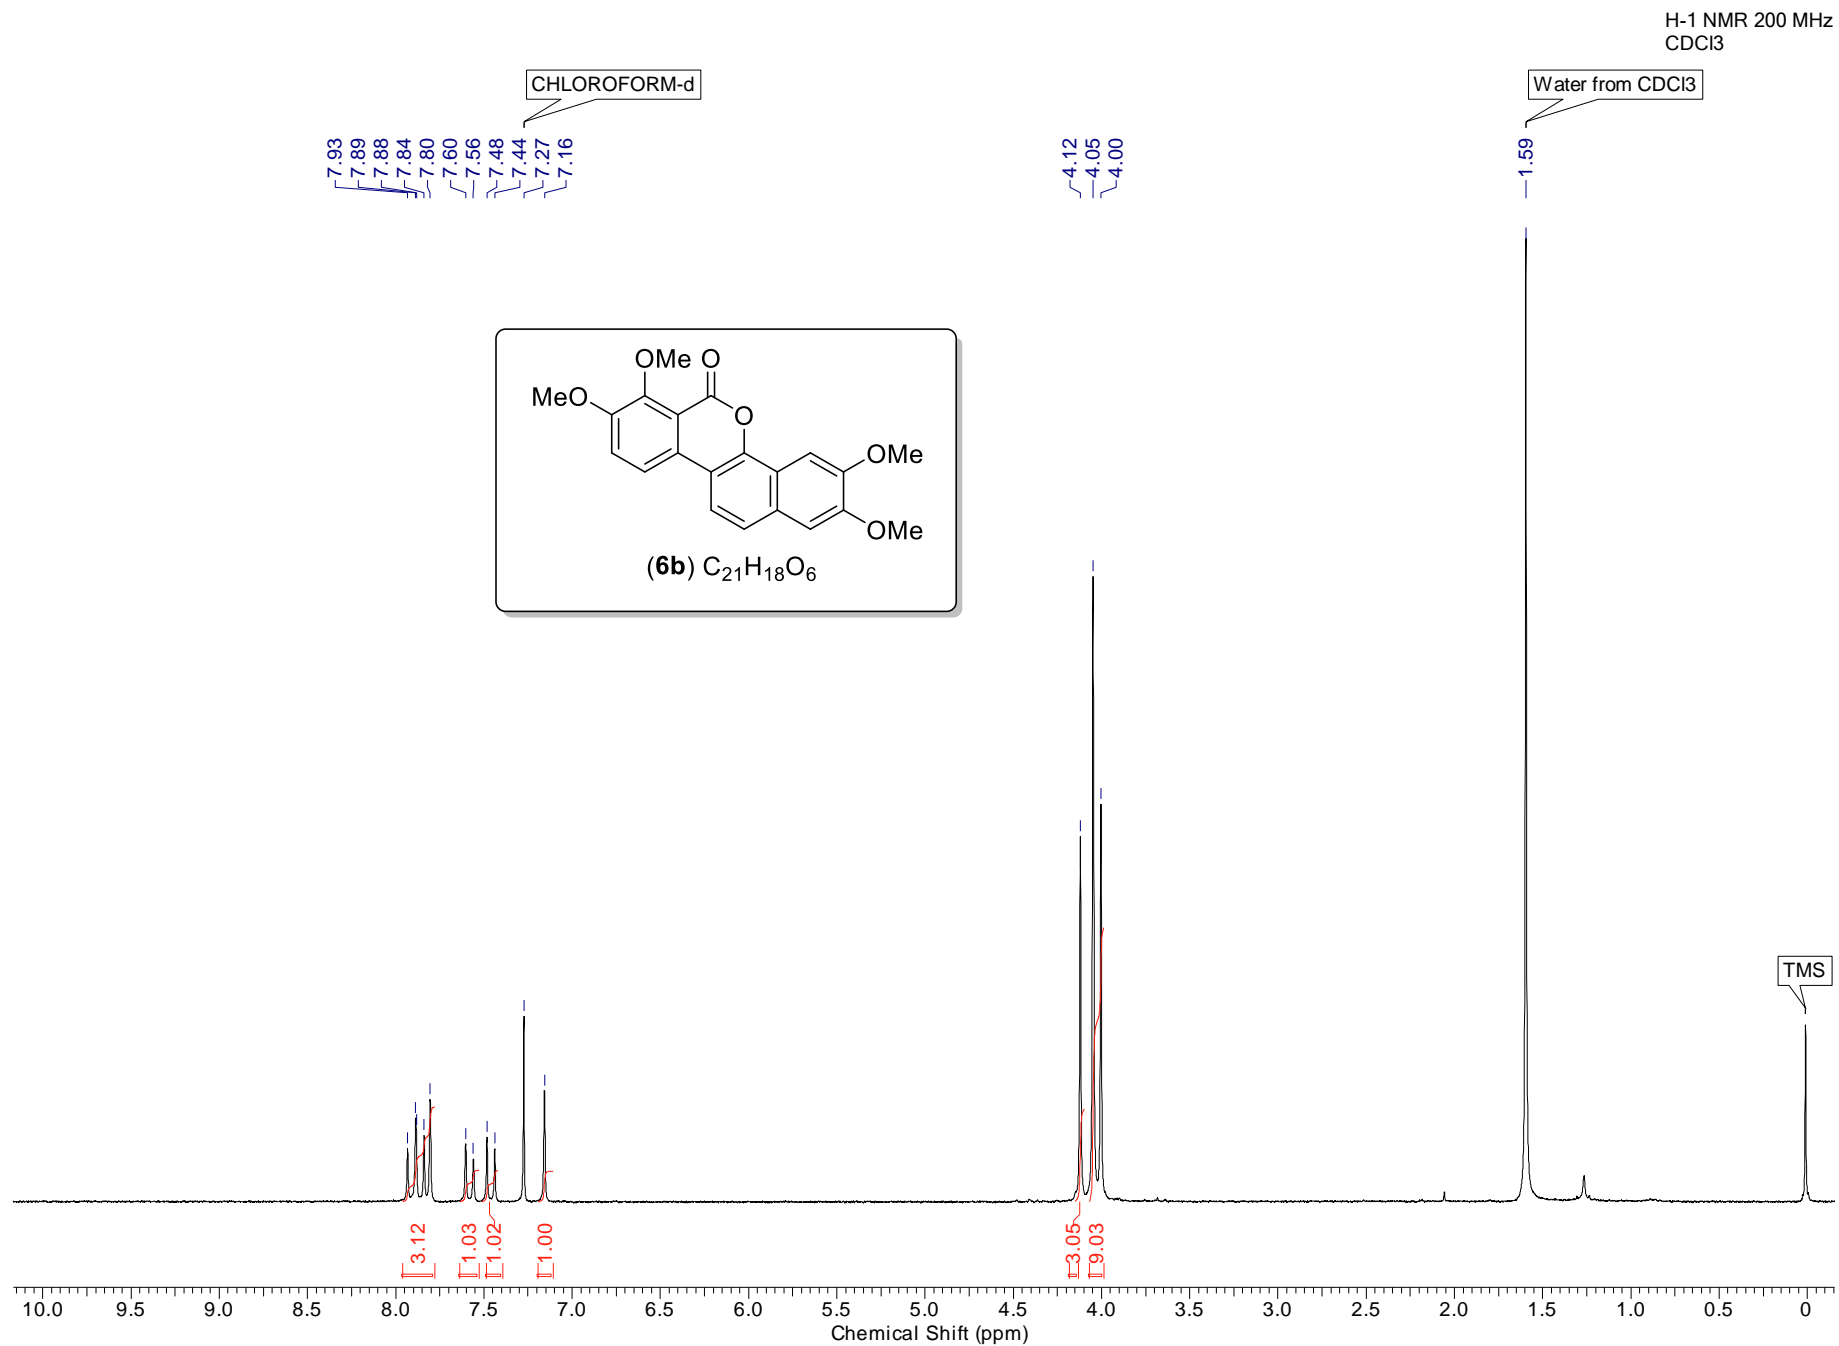

SI-21

C-13 NMR 125 MHz  
CDCl<sub>3</sub>

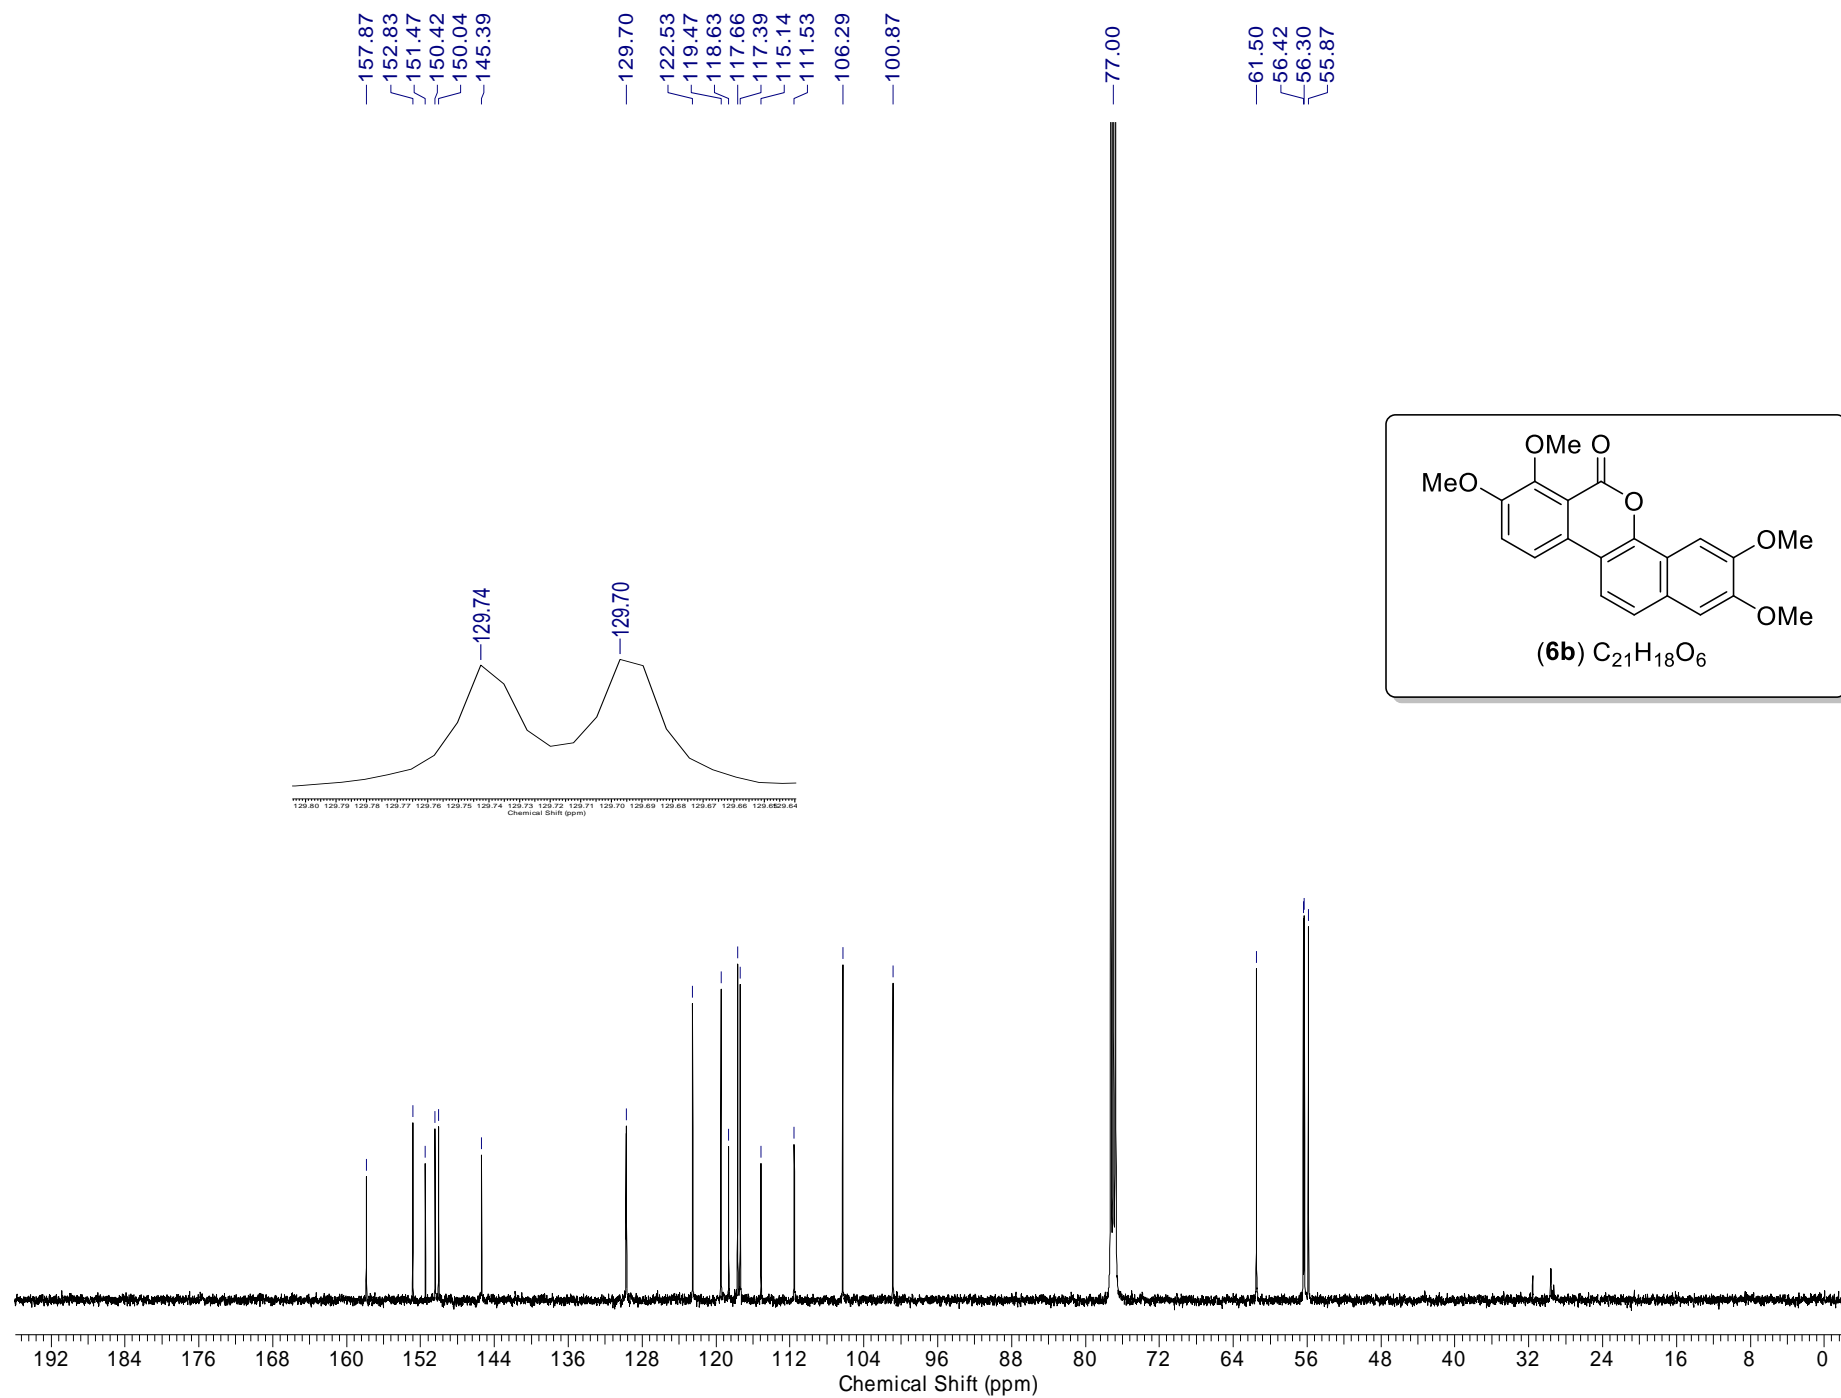

# SI-22

DEPT 125 MHz  
CDCl<sub>3</sub>

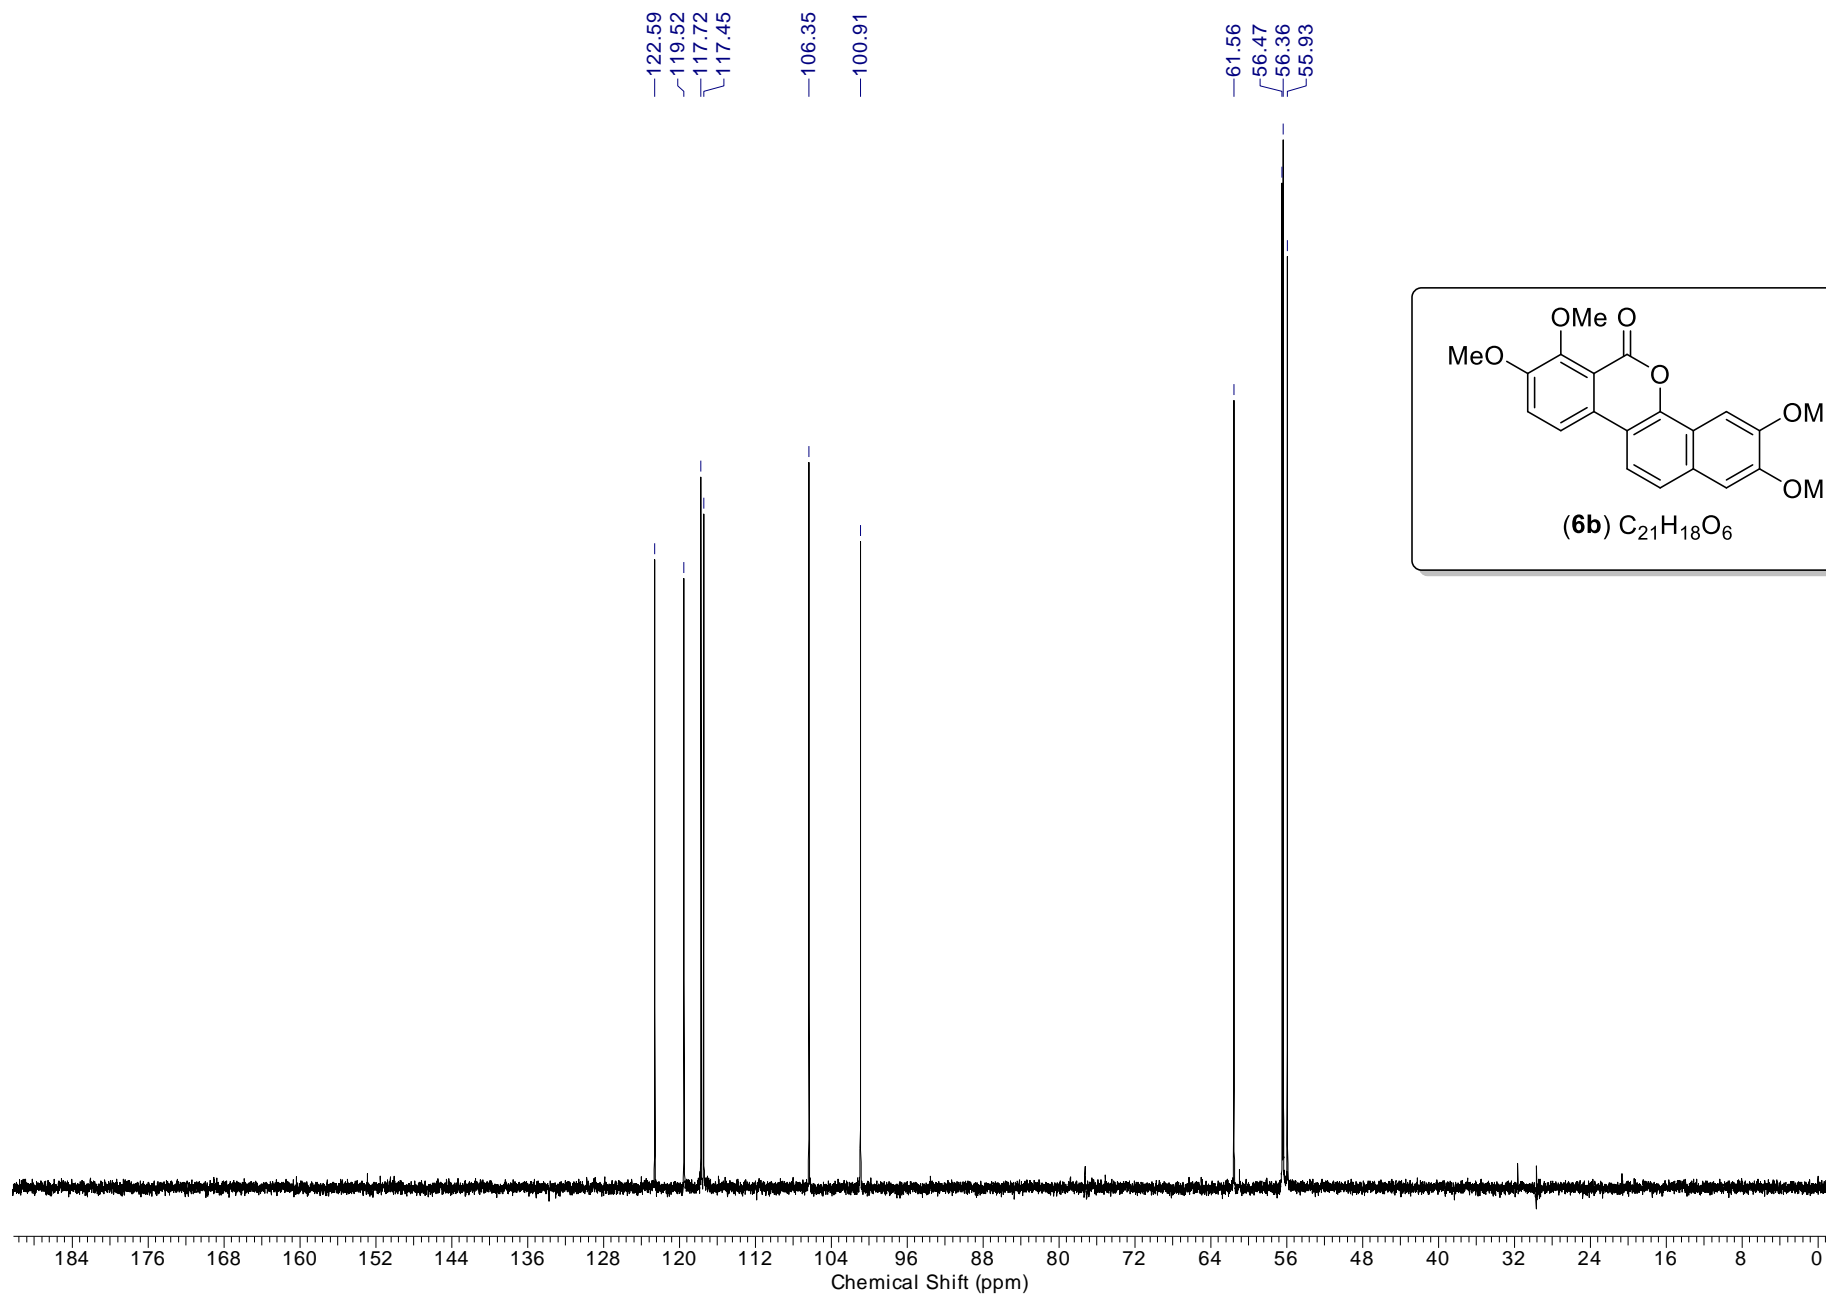

# SI-23

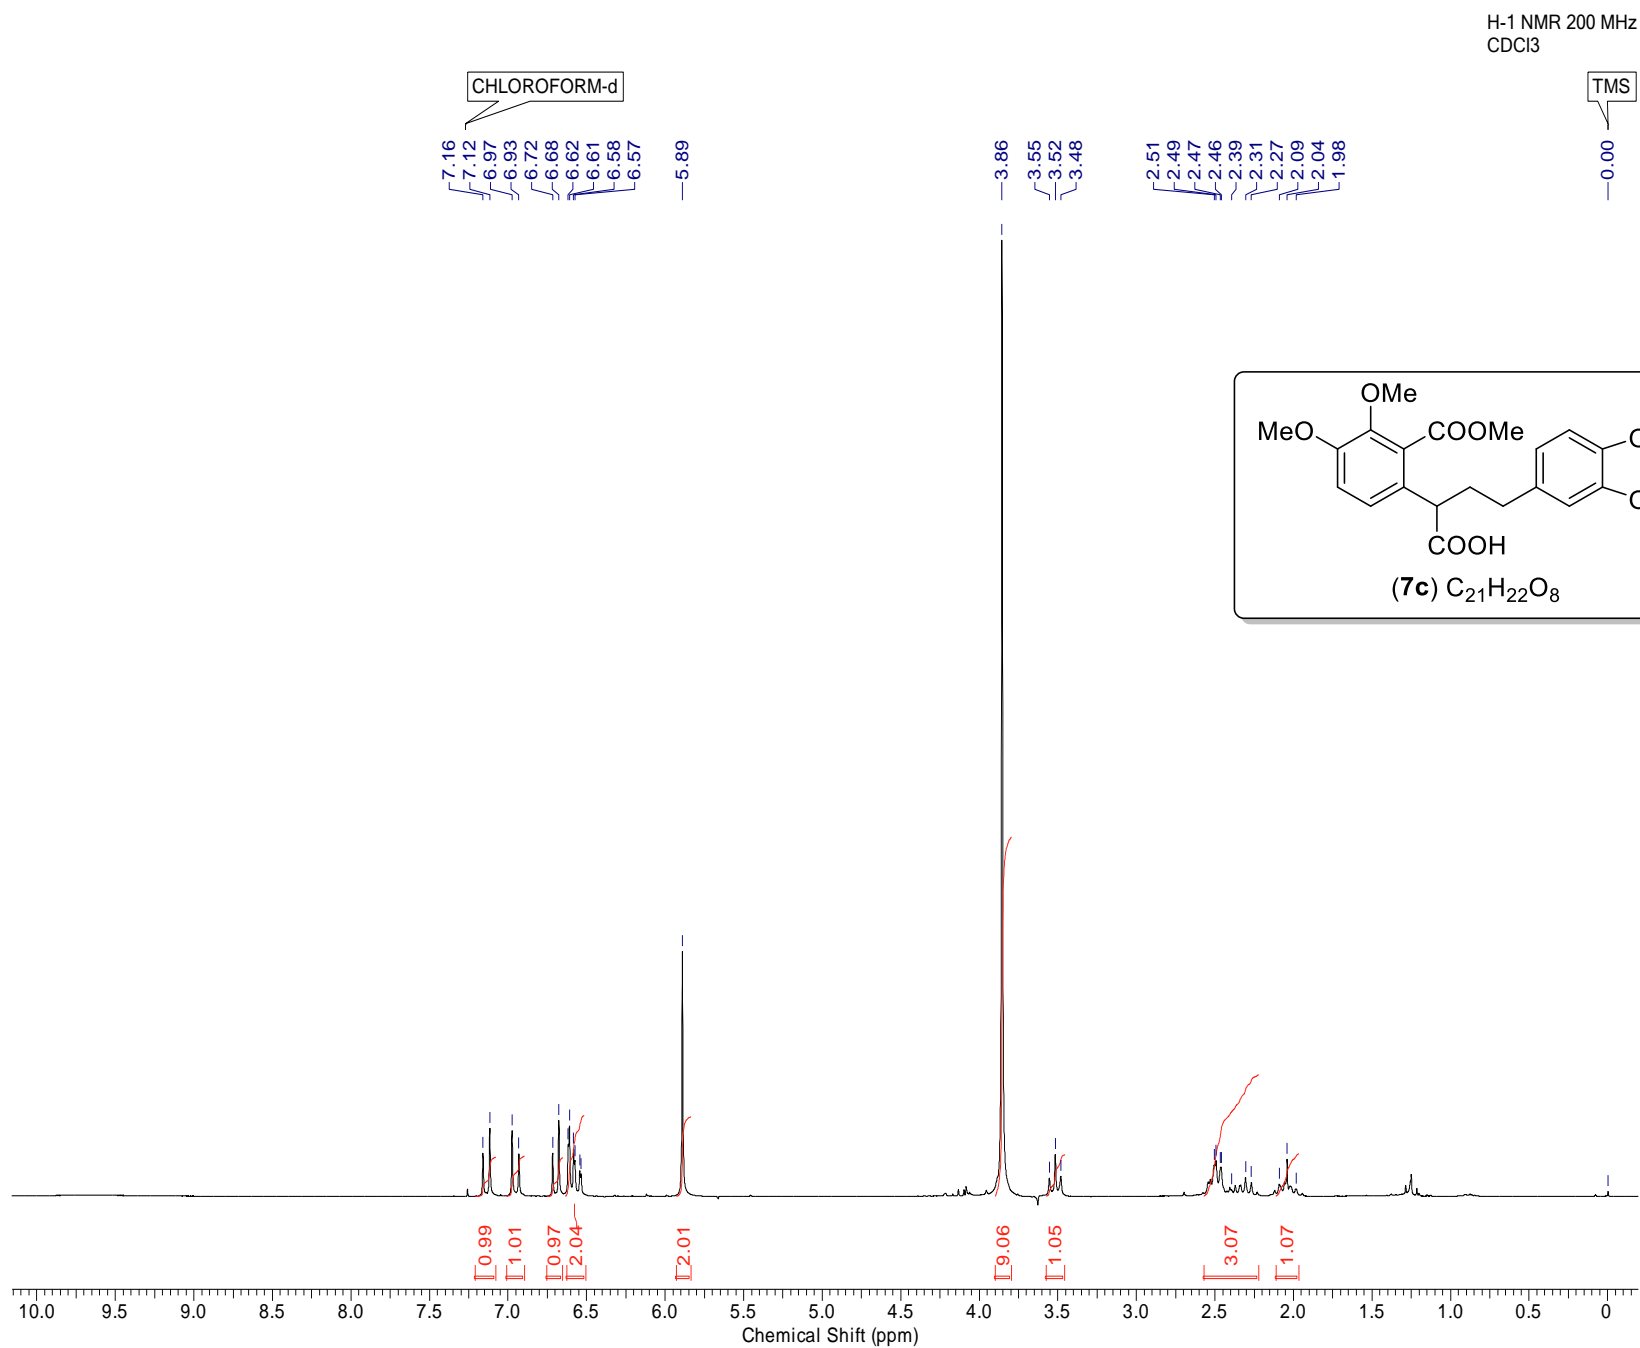

# SI-24

C-13 NMR 50 MHz  
CDCl<sub>3</sub>

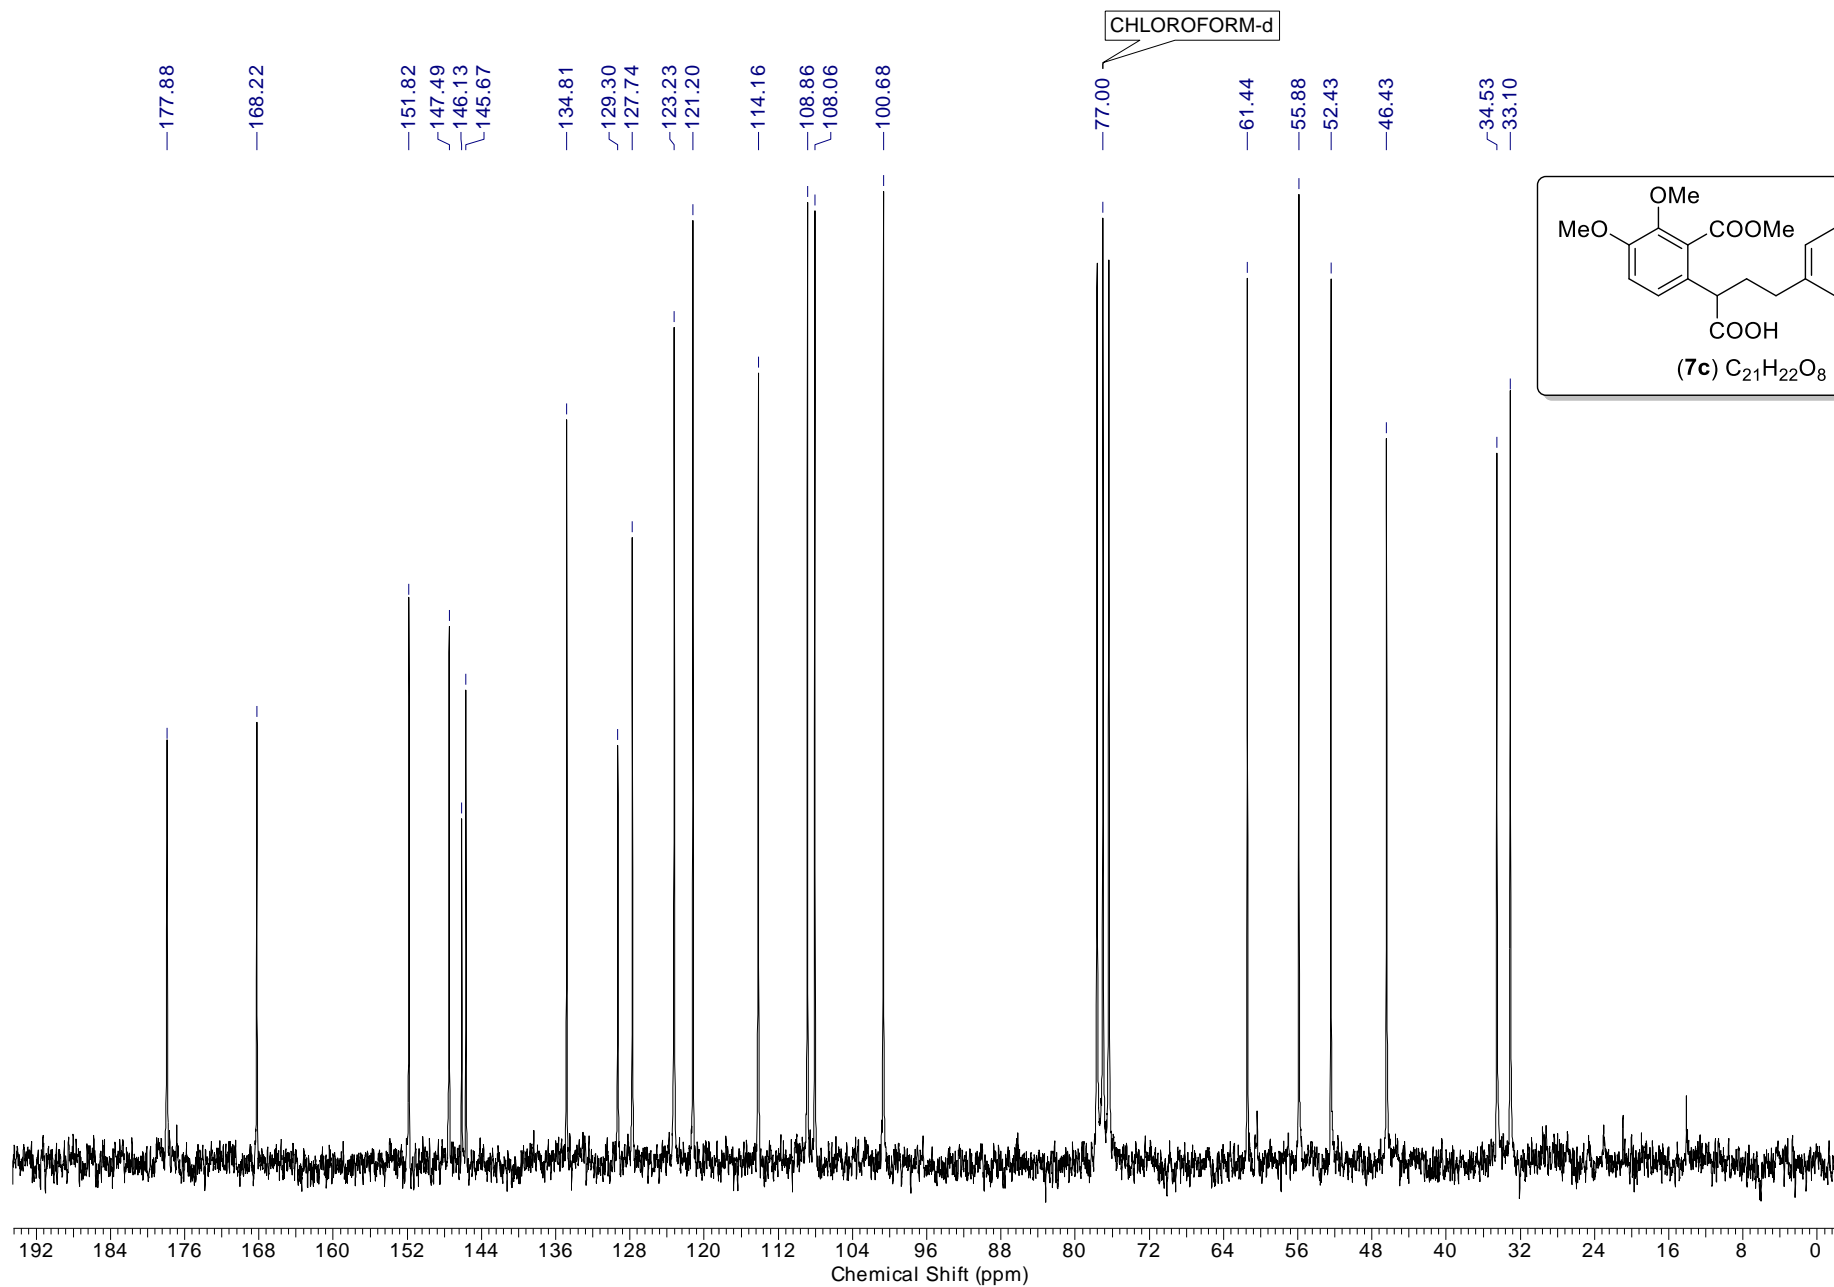



# SI-25

DEPT 50 MHz  
CDCl<sub>3</sub>

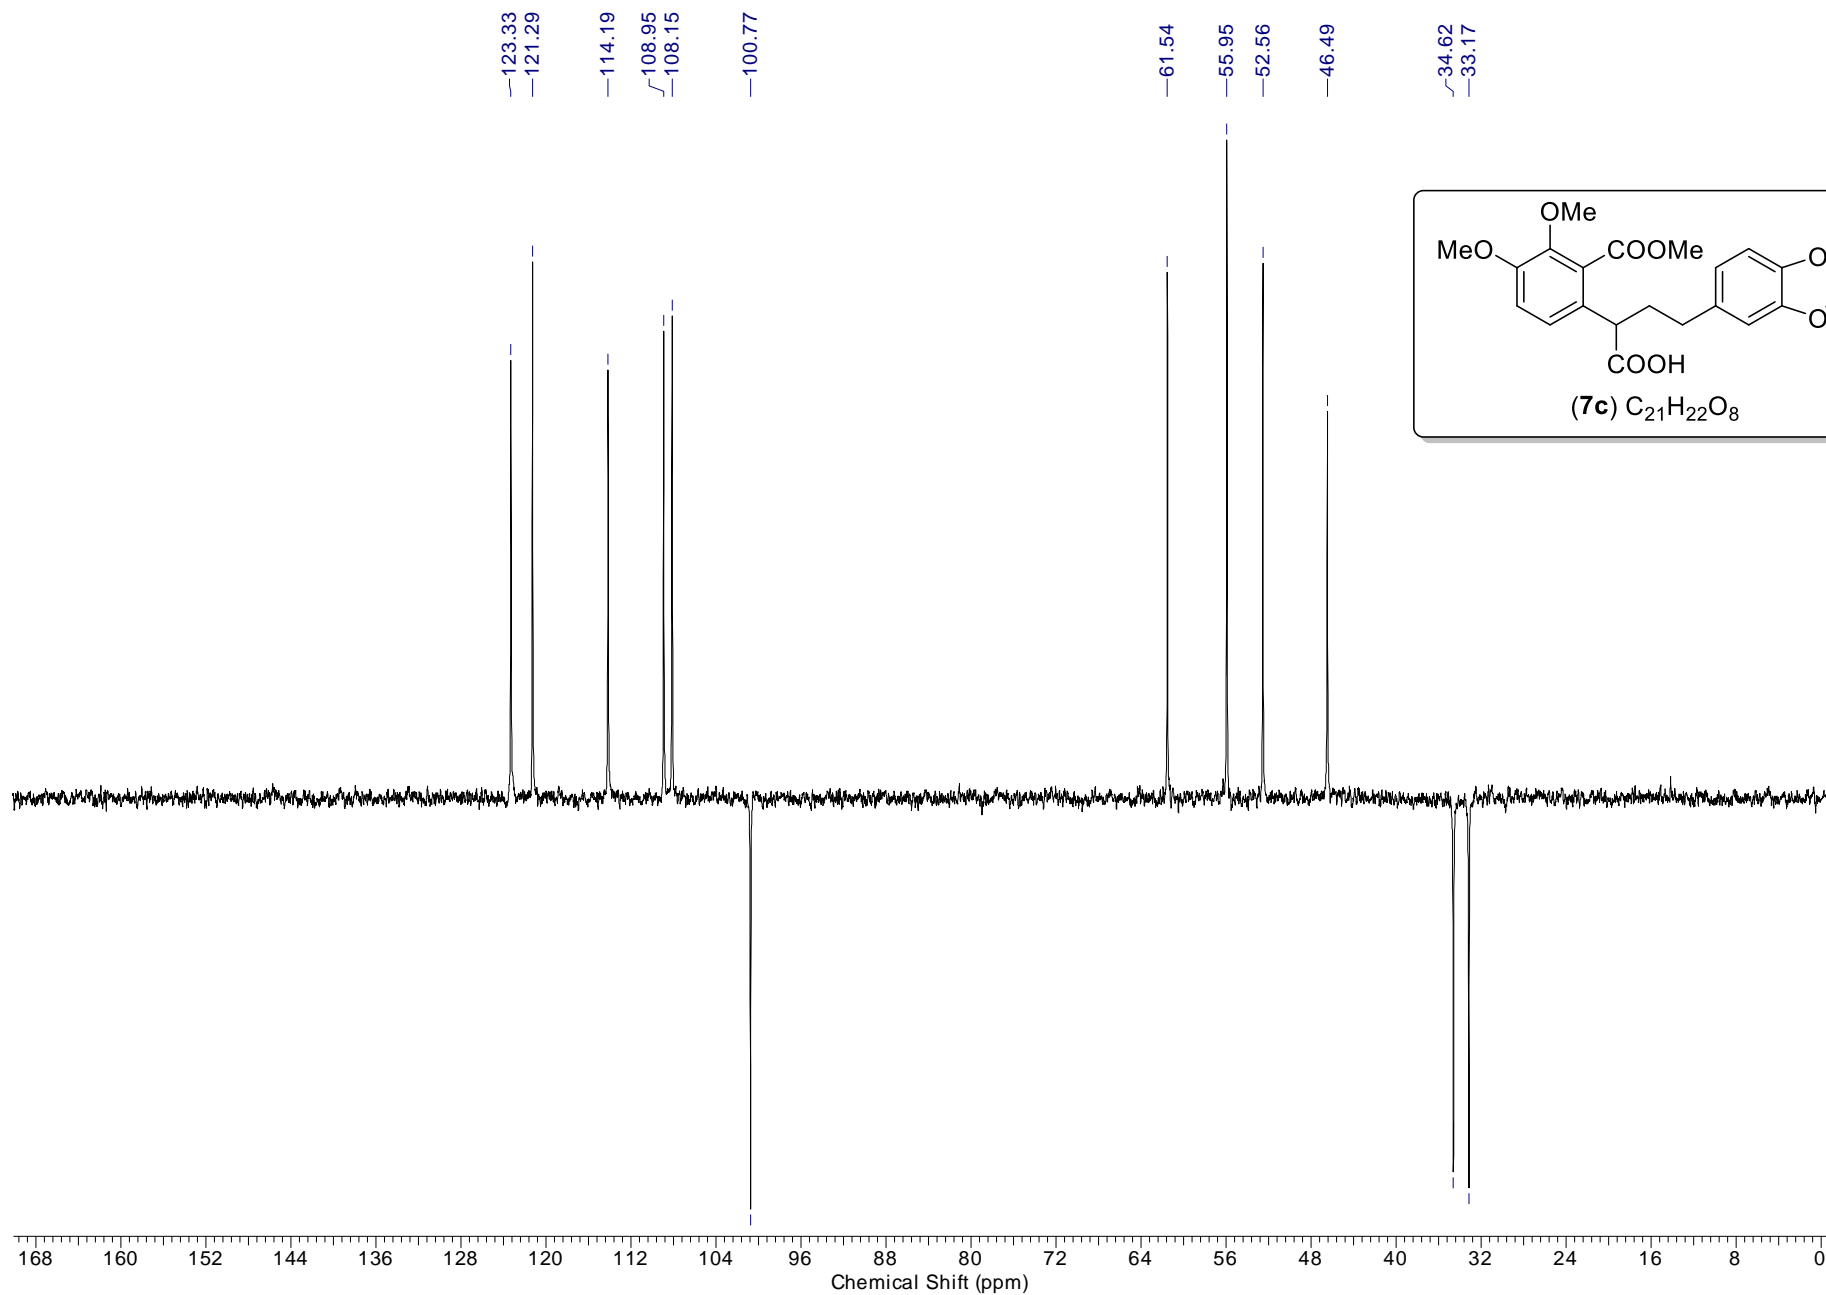

SI-26

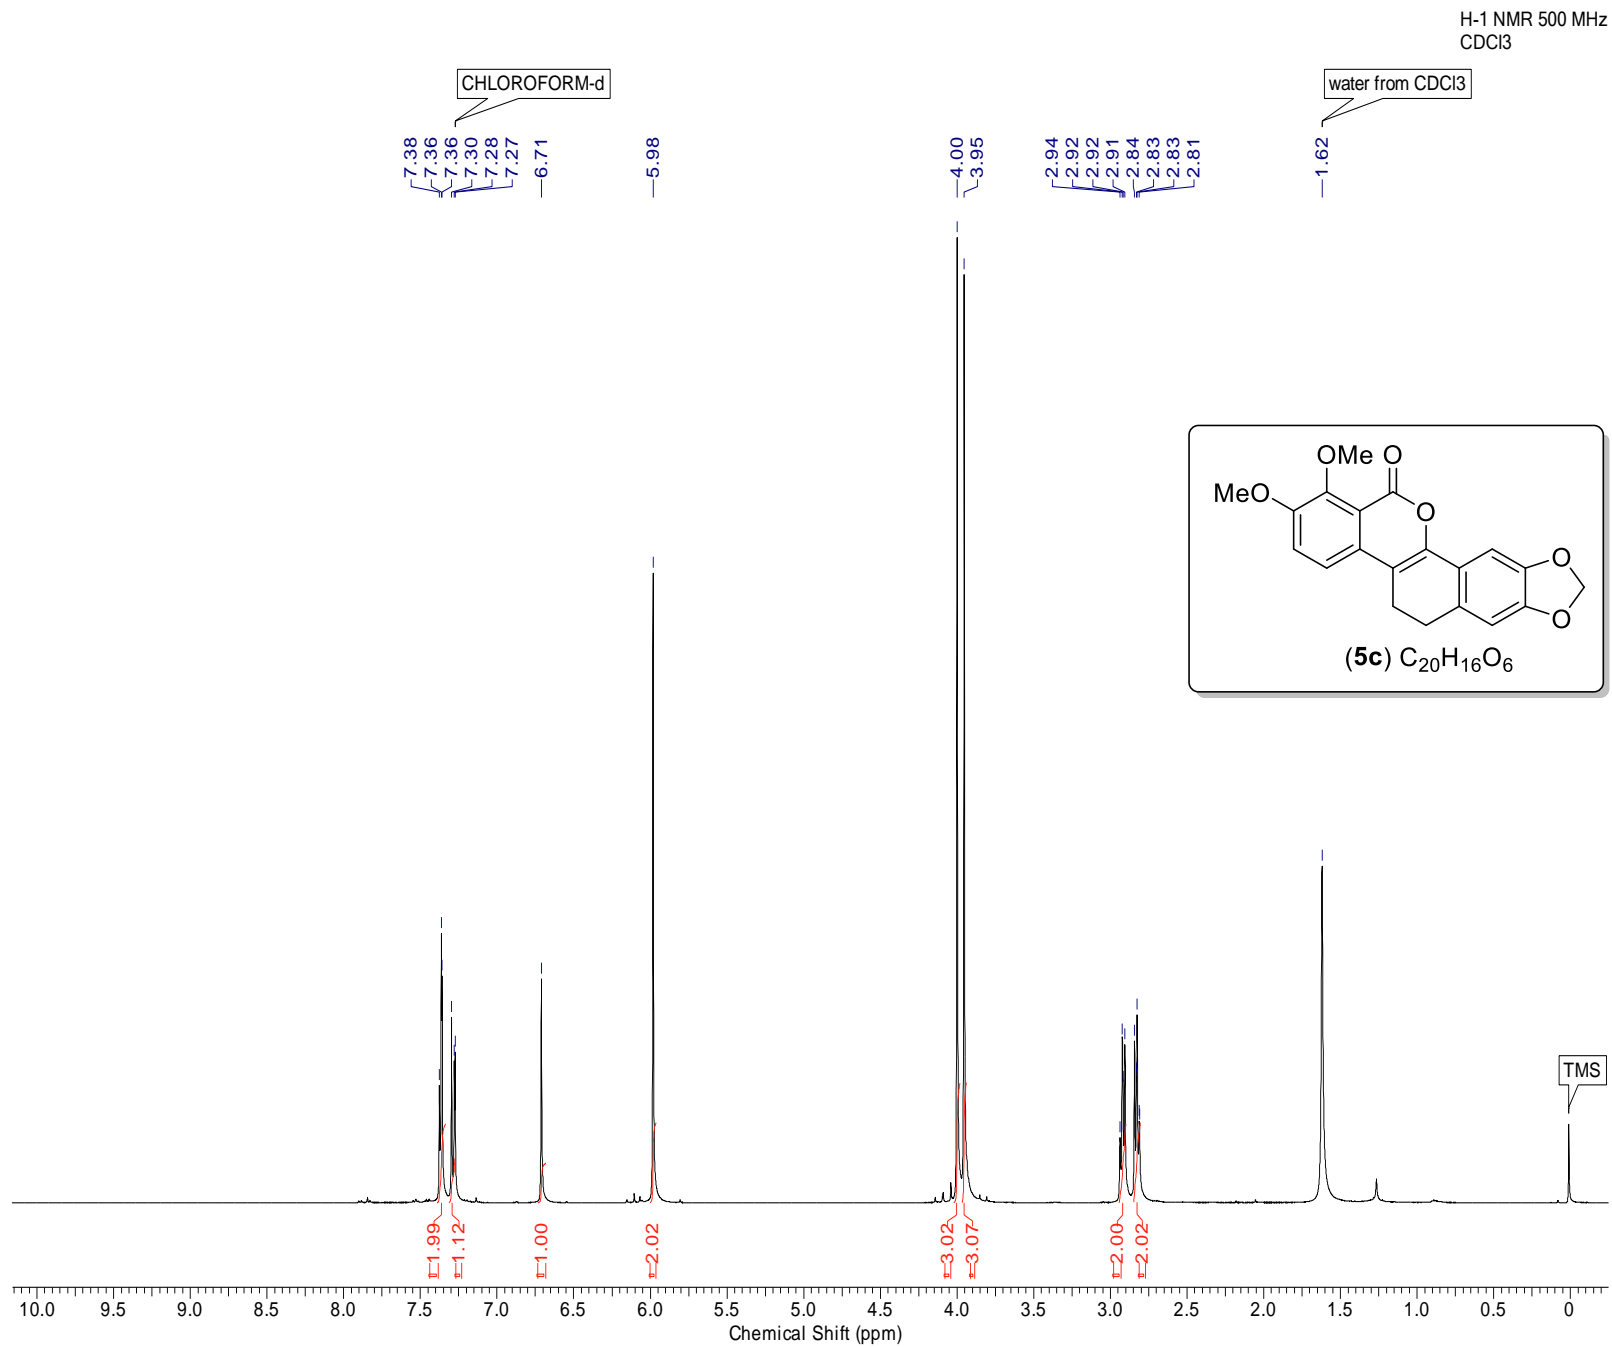

SI-27

C-13 NMR 125 MHz  
CDCl<sub>3</sub>

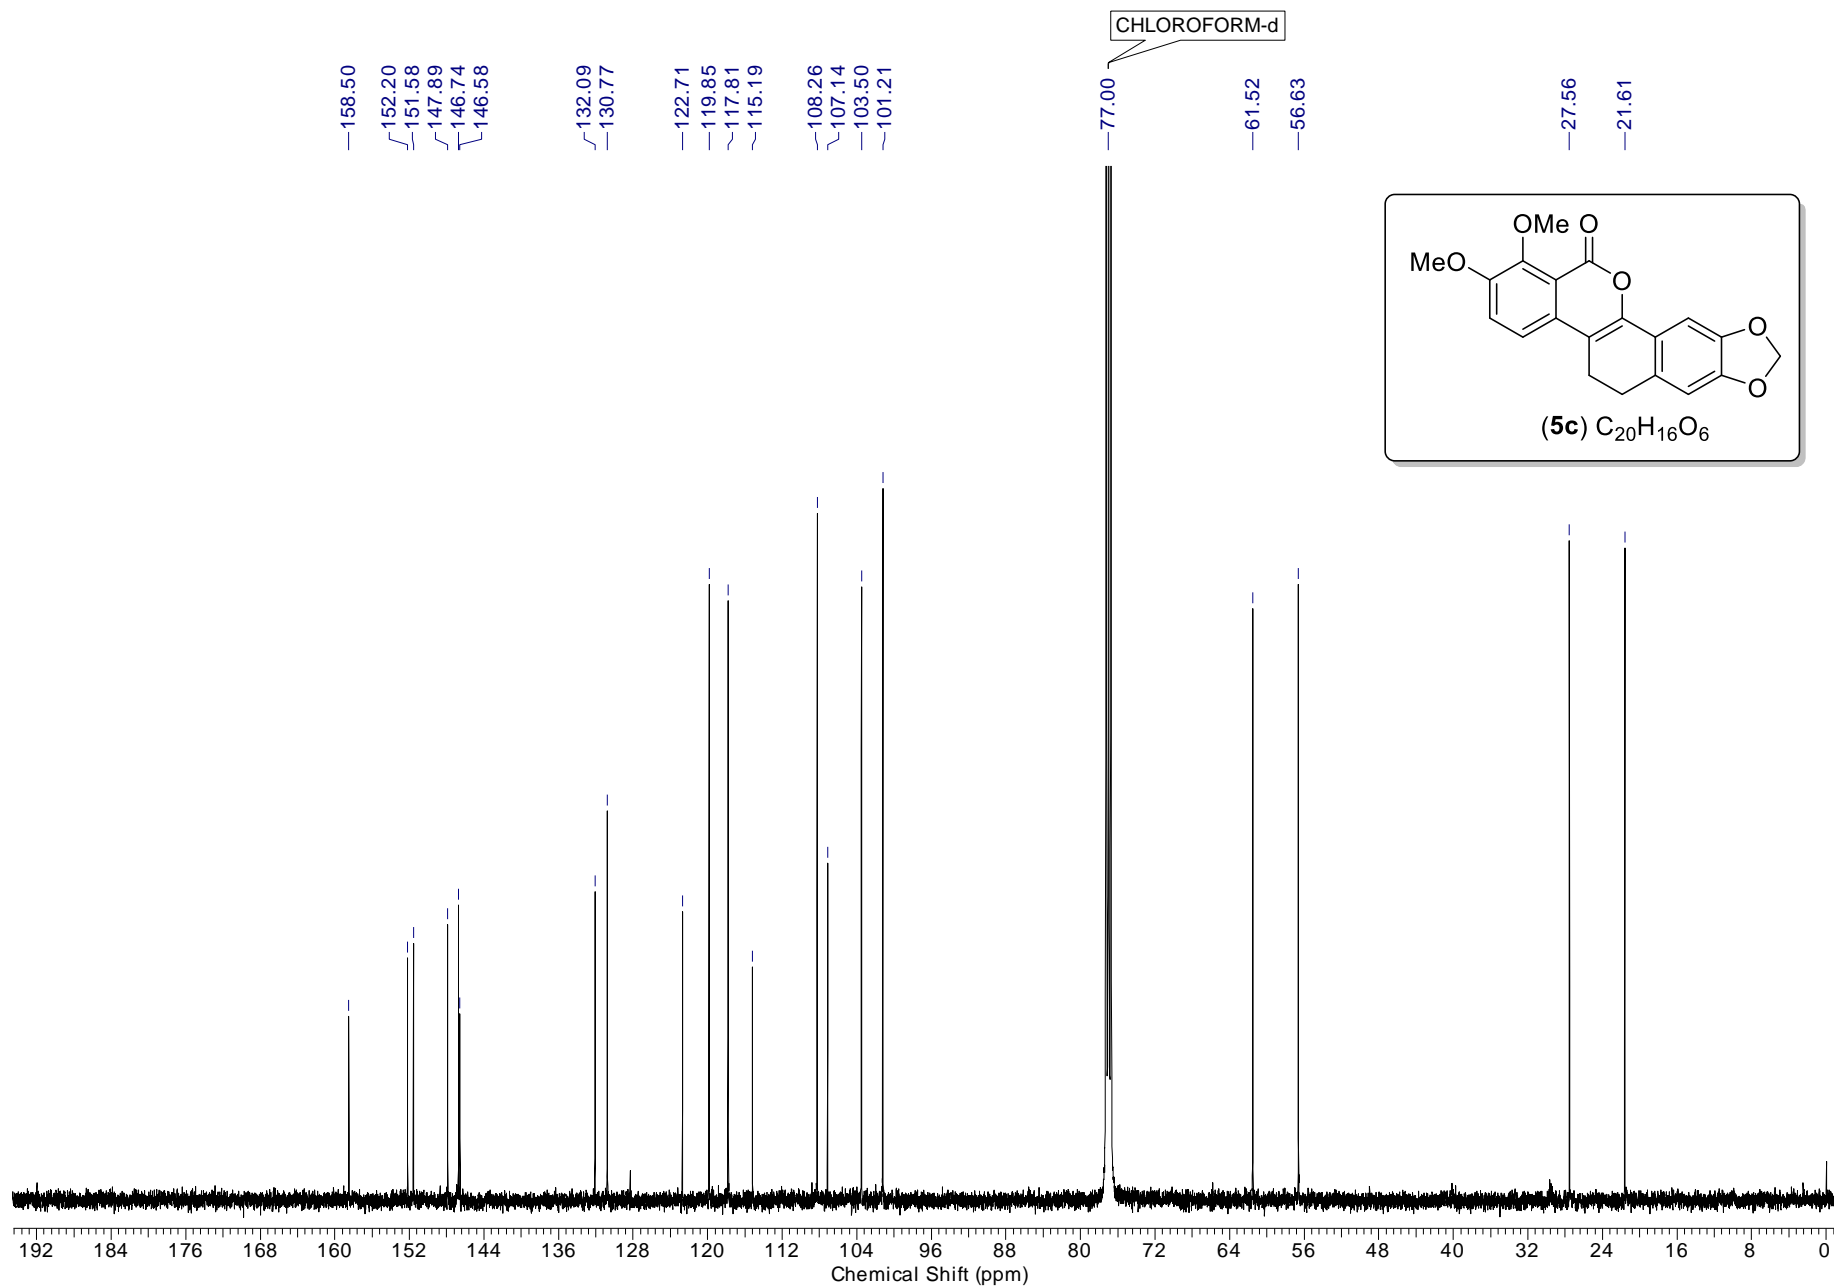

# SI-28

DEPT 125 MHz  
CDCl<sub>3</sub>;

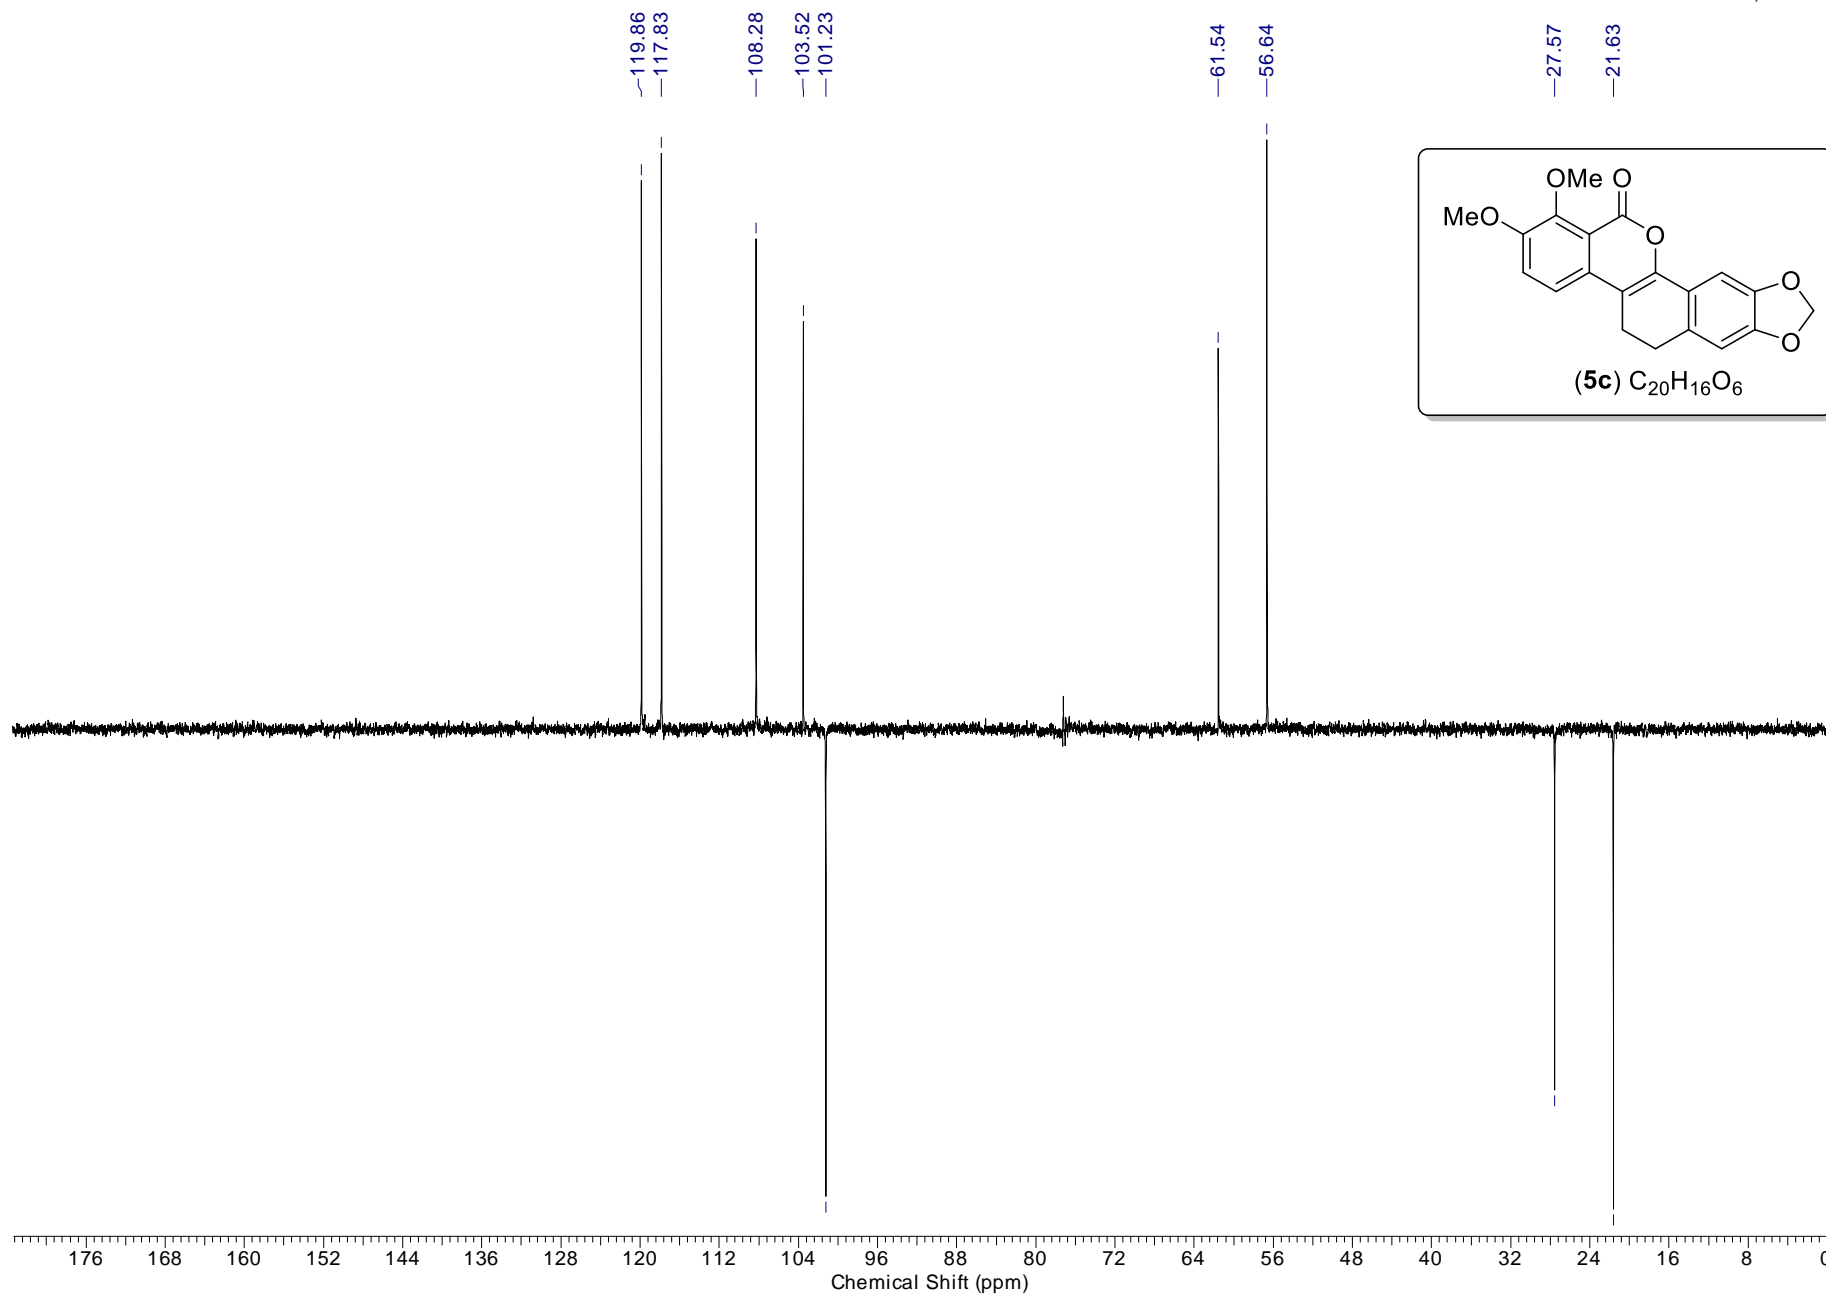

SI-29

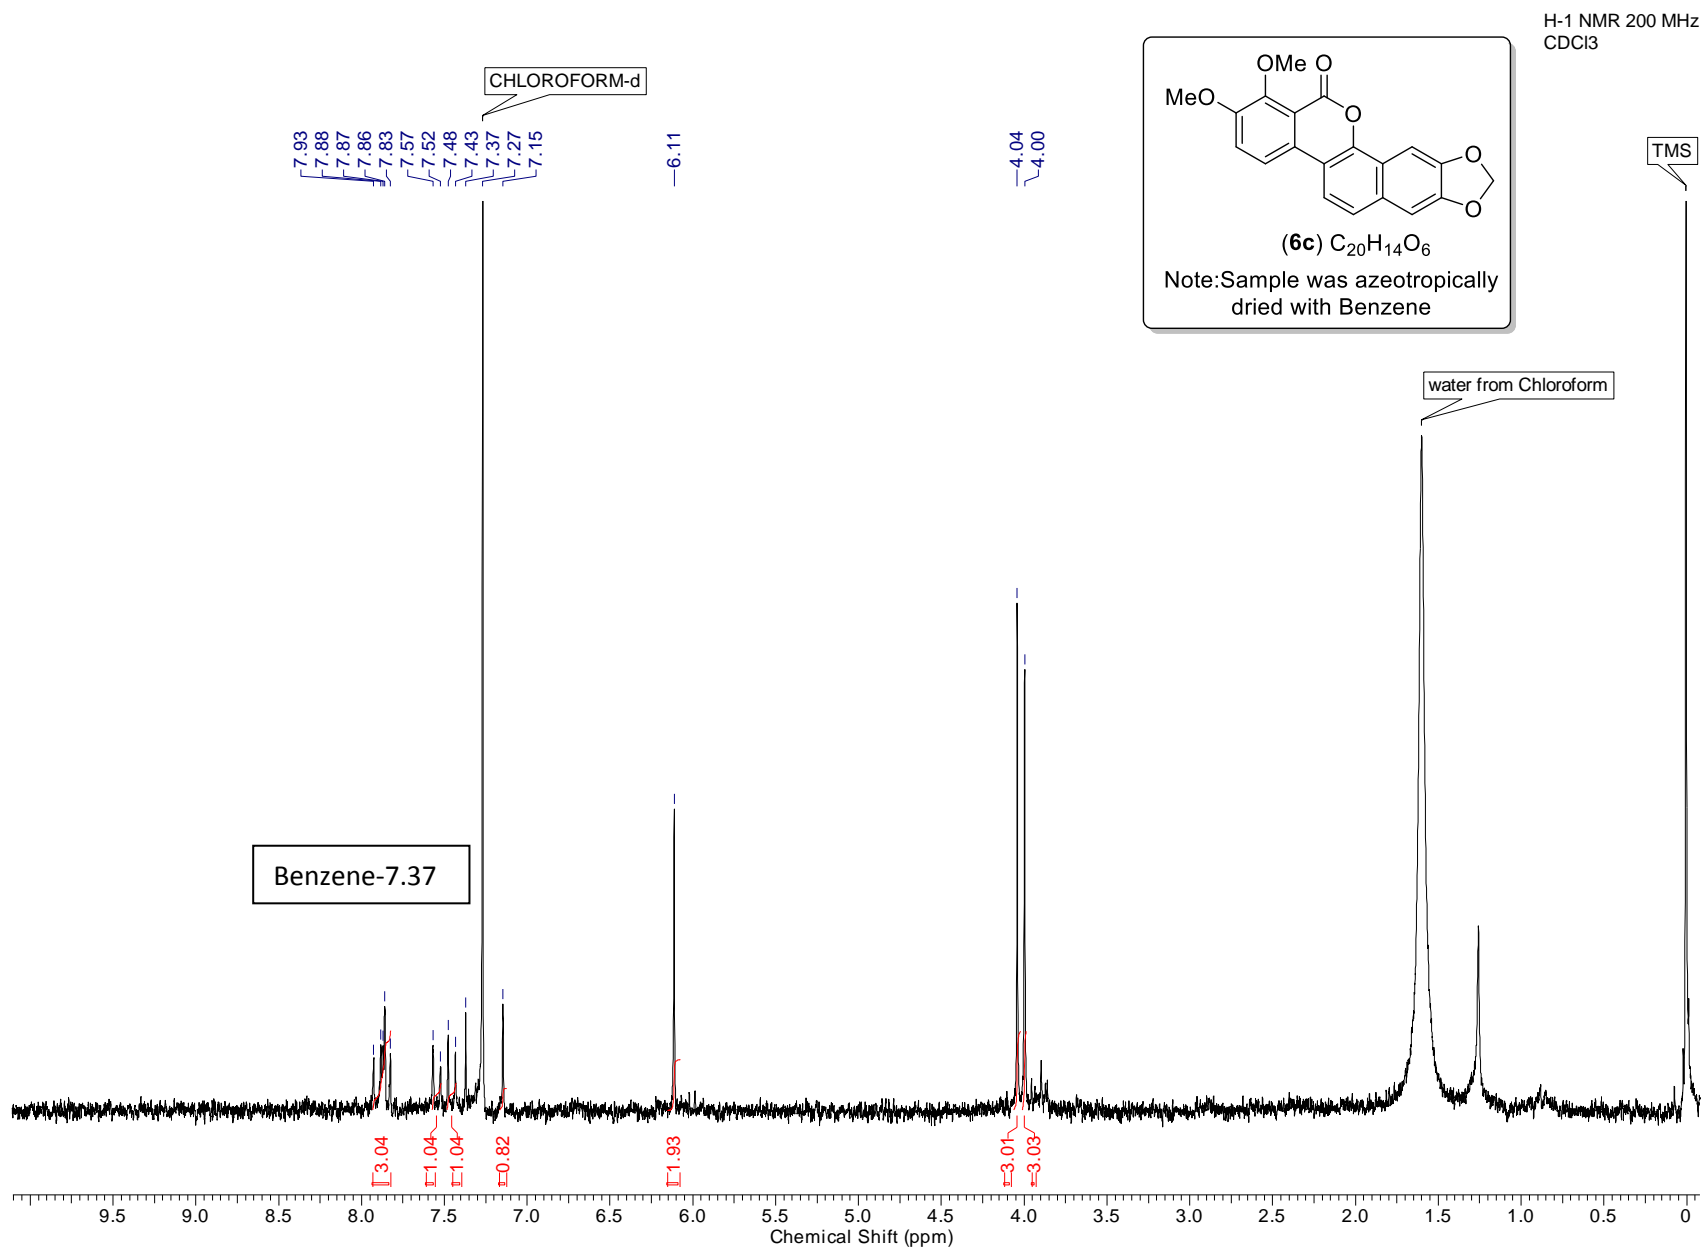

# SI-30

C-13 NMR 125 MHz  
CDCl<sub>3</sub>

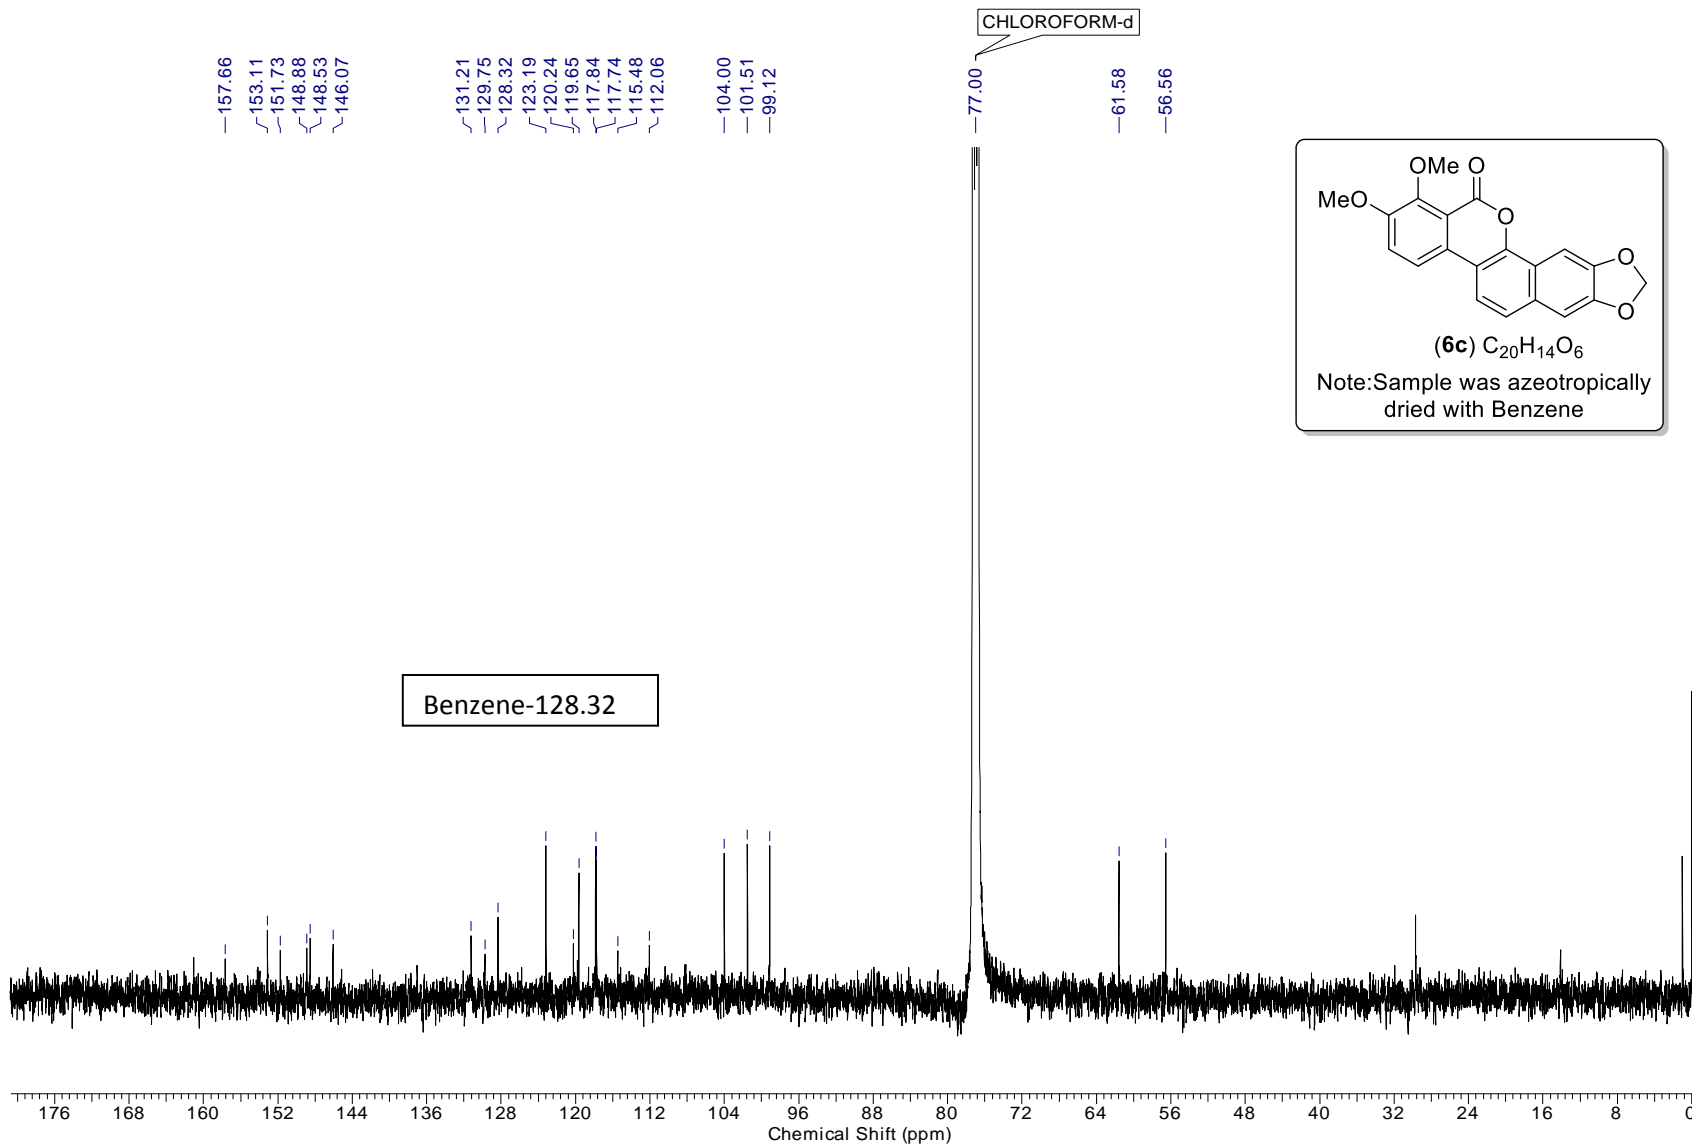

# SI-31

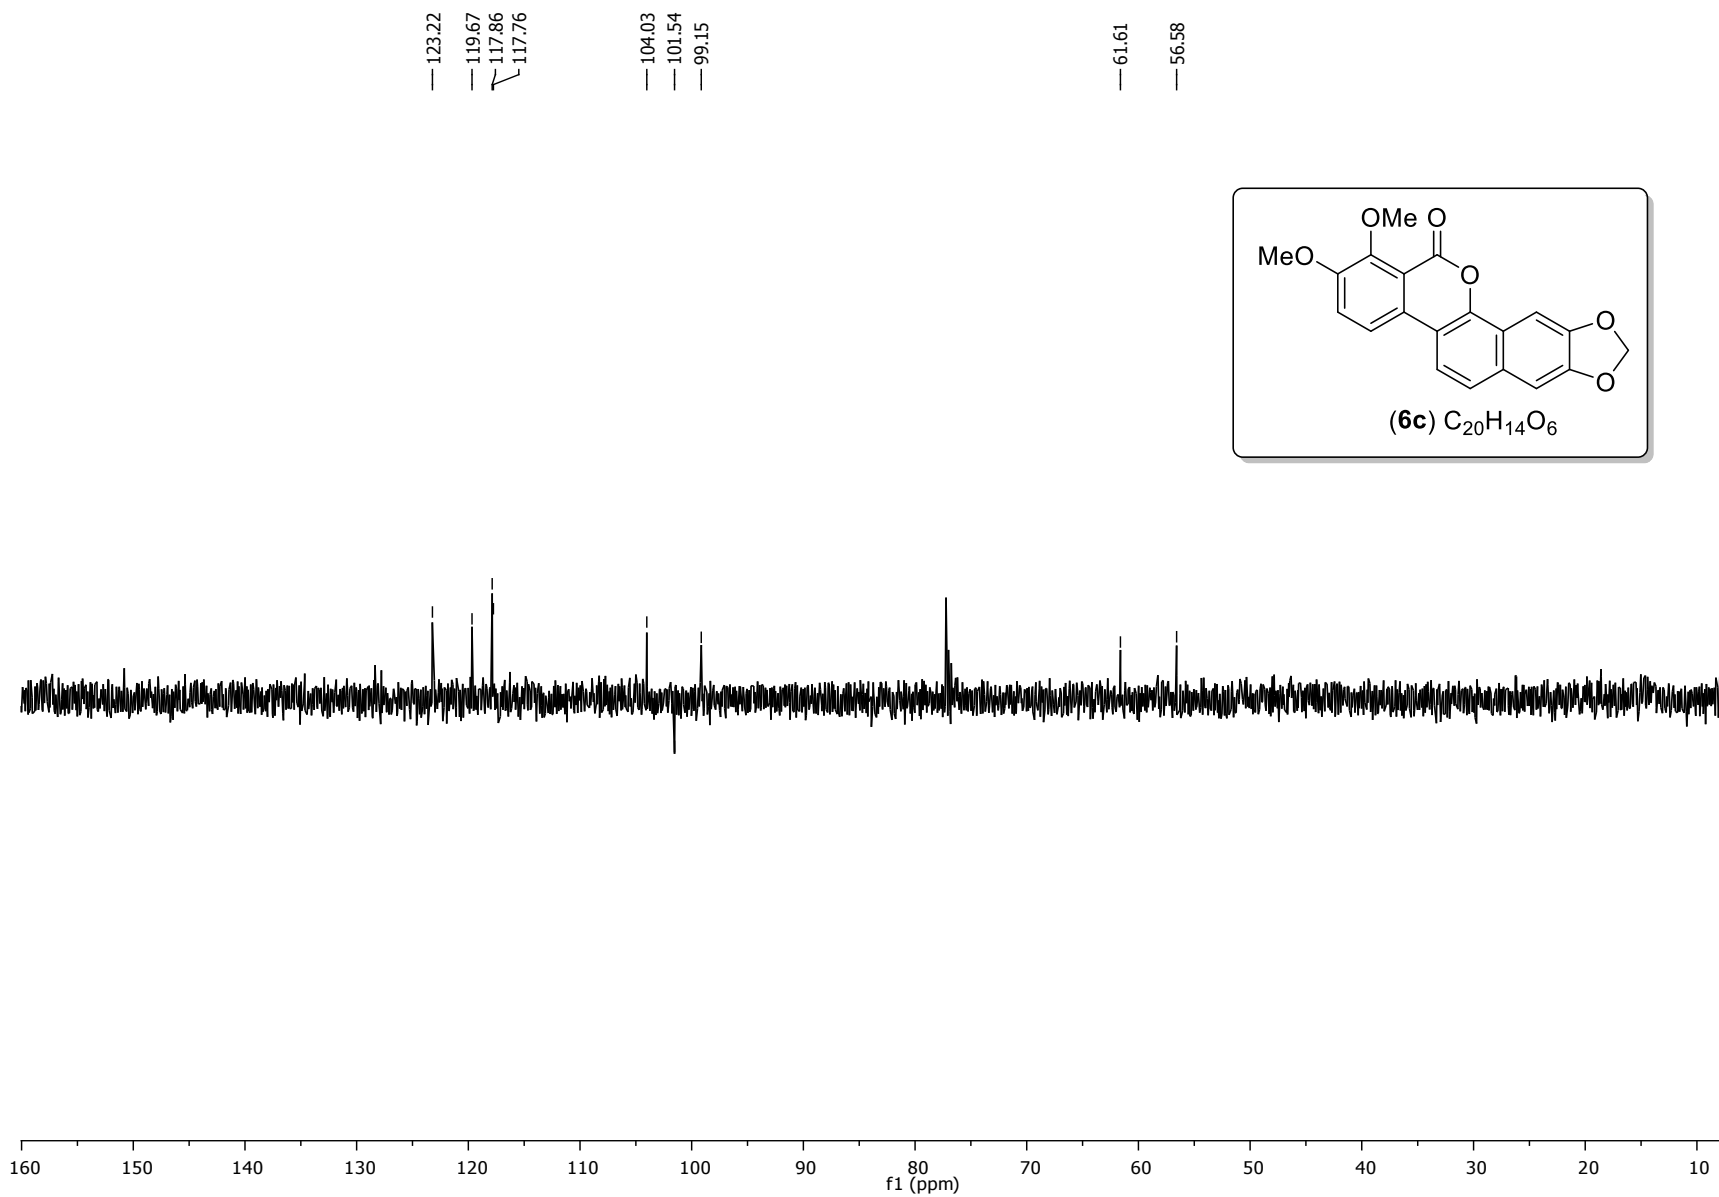

Supplement: c3ra45312j.pdf [file c3ra45312j.pdf]
